1 **Full Title: Micro-region transcriptomics of fixed human tissue using Pick-Seq**

2

3 **Short Title: mrSEQ using Pick-Seq**

4

5 Zoltan Maliga<sup>1†</sup>, Ajit J. Nirmal<sup>1,2†</sup>, Nolan G. Ericson<sup>3†</sup>, Sarah A. Boswell<sup>1,4</sup>, Lance U'Ren<sup>3‡</sup>, Rebecca  
6 Podyminogin<sup>3§</sup>, Jennifer Chow<sup>3</sup>, Yu-An Chen<sup>1</sup>, Alyce A. Chen<sup>1</sup>, David M. Weinstock<sup>2</sup>, Christine G.  
7 Lian<sup>4</sup>, George F. Murphy<sup>4</sup>, Eric P. Kaldjian,<sup>3</sup> Sandro Santagata<sup>1,5</sup> and Peter K. Sorger<sup>1,4\*</sup>

8

9 <sup>1</sup>Laboratory of Systems Pharmacology, Harvard Program in Therapeutic Science, Harvard Medical  
10 School, 200 Longwood Avenue, Boston, MA 02115, USA.

11 <sup>2</sup>Department of Medical Oncology, Dana-Farber Cancer Institute, 450 Brookline Avenue, Boston, MA  
12 02215, USA.

13 <sup>3</sup>RareCyte Inc., 2601 4th Avenue. Suite 500, Seattle, WA 98121, USA.

14 <sup>4</sup>Department of Systems Biology, Harvard Medical School, 200 Longwood Avenue, Boston, MA 02115,  
15 USA.

16 <sup>5</sup>Department of Pathology, Brigham and Women's Hospital, Harvard Medical School, 75 Francis Street,  
17 Boston, MA 02115, USA.

18 <sup>†</sup>These authors contributed equally

19 <sup>‡</sup>Current address: Gilead Sciences Inc., 199 E Blaine Street, Seattle, WA 98102, USA.

20 <sup>§</sup>Current address: Sana Biotechnologies, 188 East Blaine Street, Seattle, WA 98102, USA.

21 \*Corresponding author P.K.S. ([peter\\_sorger@hms.harvard.edu](mailto:peter_sorger@hms.harvard.edu)) cc: [alyce\\_chen@hms.harvard.edu](mailto:alyce_chen@hms.harvard.edu)

## 22 ABSTRACT

23 Spatial transcriptomics and multiplexed imaging are complementary methods for studying tissue  
24 biology and disease. Recently developed spatial transcriptomic methods use fresh-frozen specimens but  
25 most diagnostic specimens, clinical trials, and tissue archives rely on formaldehyde-fixed tissue. Here  
26 we describe the Pick-Seq method for deep spatial transcriptional profiling of fixed tissue. Pick-Seq is a  
27 form of micro-region sequencing in which small regions of tissue, containing 5-20 cells, are  
28 mechanically isolated on a microscope and then sequenced. We demonstrate the use of Pick-Seq with  
29 several different fixed and frozen human specimens. Application of Pick-Seq to a human melanoma  
30 with complex histology reveals significant differences in transcriptional programs associated with tumor  
31 invasion, proliferation, and immuno-editing. Parallel imaging confirms changes in immuno-phenotypes  
32 and cancer cell states. This work demonstrates the ability of Pick-Seq to generate deep spatial  
33 transcriptomic data from fixed and archival tissue with multiplexed imaging in parallel.

## 34 INTRODUCTION

35 Although tissues have long been imaged using chemical stains, immunohistochemistry (IHC),  
36 and *in situ* hybridization (1), the introduction of single-cell RNA sequencing (scRNA-seq) has revealed  
37 an unexpected diversity of cell types and states (2, 3). Recently announced tissue atlases (4–6) combine  
38 multiplexed tissue imaging (7–9) with transcriptomics (10) to enable joint molecular and morphological  
39 analysis of human and animal tissues. Because the molecular programs that specify tissue architecture  
40 are of inherent interest, and tissues are mixtures of many cell types, there is long-standing interest in  
41 subjecting specific regions of a tissue to RNA and DNA sequencing. The earliest approaches involved  
42 manual tissue dissection using needles (11) but Laser Capture Microdissection (LCM)(12) was the first  
43 widely used approach. In LCM, an infrared laser melts an ethylene-vinyl acetate layer onto selected  
44 regions of tissue, allowing cells in that region to be recovered and processed for sequencing. More

45 recent spatial transcriptomics approaches (*10, 13*) have made it possible to interrogate gene expression  
46 at near single-cell resolution.

47 Most methods for spatial transcript profiling require or work far better with, fresh frozen samples  
48 (*13*) for the simple reason that fixation damages nucleic acids. Frozen sections (those mounted in  
49 optimal cutting temperature medium; OCT) are used for intra-operative patient management, but in both  
50 pre-clinical and clinical settings formaldehyde-fixed paraffin-embedded (FFPE) specimens are more  
51 common for multiple reasons. FFPE sections are the diagnostic standard in clinical pathology, with  
52 pathology services in many teaching hospitals processing  $>10^5$  specimens/year; morphology is also  
53 better preserved in FFPE than OCT specimens. Archives of FFPE tissue exist for many diseases and  
54 multicenter clinical trials prefer FFPE specimens because fixed samples are easily stored and exchanged.  
55 Finally, many specimens cannot be allocated for use in research studies until they have undergone  
56 microscopic evaluation for diagnostic purposes, for example, to exclude the possibility of invasive  
57 disease. Thus, a substantial need exists for transcript profiling methods that are optimized for use with  
58 FFPE tissue in conjunction with multiplexed imaging of the same specimen. Remarkably, sequencing of  
59 single cells has recently been demonstrated using micro-regions of FFPE subjected to LCM(*14*). This  
60 result inspired us to develop approaches to micro-dissection and sequencing that were compatible with  
61 multiplexed immunofluorescence-based tissue imaging.

62 In this paper, we describe a method for isolating and sequencing micro-regions of interest  
63 (mROIs) from tissue guided by imaging of the same or serial (adjacent) tissue sections. The Pick-Seq  
64 approach evolved from simple and robust methods for mechanical recovery of tissue for sequencing (*15*)  
65 with the integration of compact robotic manipulators and automated mechanical recovery of tissue  
66 samples. Whereas many multiplexed imaging technologies focus on small fields of view (*8, 9*), our  
67 approach (*7*) involves whole-slide, multiplexed, subcellular resolution imaging of specimens up to

68 several square centimeters in area; this generates single-cell imaging on a scale sufficient to provide  
69 physiological context for mROIs (16). Whole slide imaging makes it possible to analyze tissue  
70 structures of a wide range of spatial scales and is regarded by the FDA as a diagnostic necessity (17).

## 71 RESULTS

72 The Pick-Seq method uses immunofluorescence whole-slide imaging of a standard 5-10  $\mu\text{m}$   
73 thick section followed by aspiration of an mROI into a liquid-filled 40  $\mu\text{m}$  bore needle using a robotic  
74 arm (“picker”) and subsequent deposition into a PCR tube containing lysis buffer (**Fig. 1**) (18).  
75 Successful deposition can optionally be confirmed by imaging through a flat-bottom tube. To capture  
76 and sequence RNA from the mROIs, lysed cells were de-crosslinked, mRNA purified using Oligo(dT)  
77 beads, and sequencing libraries then prepared (Methods). Pick-Seq has been implemented in a  
78 commercial instrument (19) (RareCyte CyteFinder®) that integrates a high-resolution, slide-scanning  
79 fluorescence microscope with a robotic picker but could be performed with other microscopes and  
80 robotic manipulators.

81 To test Pick-Seq on a well-characterized tissue, we stained a section of FFPE human tonsil with  
82 B- (CD20) and T- (CD3, CD4, CD8) cell markers and, from an adjacent section, collected five mROIs  
83 from two B-cell follicles and five mROIs from an inter-follicular region rich in T cells (“T-cell zone”)  
84 (**Fig. 2, A and B**); subsequent post-pick imaging of the picked section showed that each picked mROI  
85 contained ~5-10 cells. The resulting bar-coded RNA-sequencing (RNA-seq) libraries detected, on  
86 average, 2,700 genes per mROI, and 13,033 unique genes across all ten mROIs (**Table S1, Fig. 2C**).  
87 Differentially expressed genes (DEGs) between the T-cell zone and B-cell follicles included the T- and  
88 B-cell lineage markers *CD3D* and *CD19*, respectively, as expected (FDR < 0.05; **Fig. 2D**). We used  
89 CIBERSORT to deconvolve the cell composition of the mROIs from their gene expression profiles (20)  
90 and identified a high abundance of T or B cells expected within each compartment (**Fig. 2E**), but

91 transcripts from other cell types were also detected (note that relative gene counts and CIBERSORT  
92 fractions are not identical because deconvolution uses gene set signatures, not single genes).  
93 Fluorescence microscopy confirmed the presence of some B cells in T-cell zones and T cells in B-cell  
94 follicles (**Fig. 2F**), but principal component analysis (PCA) was able to resolve the two B-cell follicles  
95 from each other as well as from the T-cell zone (**Fig. 2G**). When considering only the B-cell follicles,  
96 DEGs included *JCHAIN*, *MZB1*, and *CD21* (**Fig. 2H**), and subsequent imaging confirmed spatially  
97 restricted expression of CD21 (**Fig. 2B**), consistent with the absence of a follicular dendritic cell  
98 network in the sectioned plane of one follicle (21). We conclude that Pick-Seq can uncover spatially  
99 restricted gene expression patterns from FFPE tissue and these patterns can be confirmed by imaging.

100 Frozen tissues have less RNA degradation than FFPE specimens, and, if available, allow for  
101 deeper RNA sequencing than FFPE. We performed Pick-Seq on a frozen section from an ER/PR double-  
102 positive breast cancer biopsy that had been stained to identify tumor (cytokeratin) and T (CD3, CD8)  
103 cells. Fourteen mROIs were recovered from three tissue microenvironments: cancer cells alone (4  
104 mROIs), T cells outside the tumor (5 mROIs), and regions containing tumor-infiltrating T lymphocytes  
105 (TILs; 5 mROIs). In the case of TIL mROIs, imaging showed that each pick contained one (mROIs  
106 TIL1-3) or three (mROI TIL4) T cells along with an estimated four to six cancer cells (**Fig. 3A**). The  
107 RNA-seq libraries prepared from these picks detected, on average, 4,640 unique genes per mROI  
108 (~16,800 genes in all mROIs; **Table S2, Fig. 3B**). We used single-sample gene set enrichment analysis  
109 (ssGSEA) to identify classes of genes that were over-represented, and we confirmed enrichment of  
110 breast cancer-related and T-cell signatures in tumor and T-cell containing mROIs, respectively (**Fig.**  
111 **3C**). DEGs included estrogen receptor 1 (*ESR1*) and progesterone receptor (*PGR*; **Fig. 3D**), consistent  
112 with an ER<sup>+</sup>/PR<sup>+</sup> luminal A tumor subtype). *ANXA1*, a gene that promotes Th1 differentiation of T cells,  
113 was found only in regions of tumor-infiltrating T cells (TILs; **Fig. 3D**), suggesting tumor specific

114 immune-suppression (22). Based on these data, we conclude that Pick-Seq can identify a single T cell in  
115 a background of transcriptionally unrelated cells, although signal improves when an mROI contains  
116 three rather than one T cell (compare TIL4 to TIL1, for example; **Fig. 3C**).

117 Comparing data from FFPE tonsil with frozen breast cancer tissue (**Fig. 2C and 3B**), we found  
118 that transcriptome coverage was 50-70% greater in frozen than fixed tissue; we interpret this as arising  
119 from the higher RNA quality of frozen samples. Because polyA tail purification was used to generate  
120 sequencing libraries, RNA degradation in mROIs from FFPE specimens resulted in read data that was  
121 strongly biased toward the 3' ends of genes as revealed by the cumulative distribution of read positions  
122 along the length of each gene (**Fig. S1, A and B**). The fraction of aligned reads was also greater for  
123 mROIs from frozen than FFPE specimens (an average of ~ 95% for picks from frozen breast cancer  
124 samples vs. 50-80% for tonsil and melanoma; **Fig S2A**). Despite this 3' bias, FFPE sequencing appeared  
125 to correctly capture cellular composition, as judged by imaging performed in parallel(23).

126 To study transcriptional changes associated with differences in tumor histology that impact  
127 disease outcome, we analyzed an archival FFPE *BRAF*-wild type *NF1*-mutant melanoma. This sample  
128 contained five distinct histologic regions: (i) early-stage melanoma *in situ* (MIS) (**Fig. 4, A and B**); (ii)  
129 tumor, (iii) invasive tumor margin involving tumor growth into the normal dermis; (iv) tumor-adjacent  
130 infiltrating lymphocytes (TILs) representing a brisk TIL response (**Fig. 4B**); and (v) exophytic  
131 melanoma projecting up towards the surface of the skin (not shown). Seventy-five mROIs samples were  
132 collected from this sample, each containing approximately 5-20 cells, with an average of 2,377 genes  
133 detected per mROI (**Table S3, Fig. S2B**), consistent with results from the FFPE tonsil sample (**Fig. 2C**).  
134 The PCA landscape across all mROIs (25% of variance explained in PC1 and PC2) revealed four  
135 clusters with mROIs from exophytic and invasive tumor near each other and distinct from the MIS and  
136 brisk TIL regions (**Fig. 5A**). The mROIs from the invasive margin clustered close to, but still largely

137 separate from, the exophytic and invasive tumor clusters. Pairwise analysis among all five histological  
138 sites identified 208 to 947 DEGs; data in **Fig. 5B** shows 705 DEGs for tumor vs. MIS regions. Tumor  
139 enriched DEGs included *S100B*, a progression marker (24), and *CD63*, a negative regulator of the  
140 epithelial-mesenchymal transition in melanoma (25) (**Fig. 5C**). Imaging of an adjacent tissue section  
141 confirmed the melanocyte-restricted expression of S100B and CD63 in tumor regions (**Fig. 5D**),  
142 consistent with the annotation of these proteins as progression markers. When Pick-Seq was repeated on  
143 adjacent specimens, batch-independent clustering by region was observed, demonstrating the  
144 reproducibility of the method (**Fig. 5, E and F**).

145 Enrichment of immune-related signatures in mROIs from the TIL and MIS regions (**Fig. 6**) was  
146 consistent with imaging of an adjacent tissue section for the presence of macrophages and T cells (**Fig.**  
147 **4B**). The ratio between signatures for MITF (a transcription factor) and AXL (a receptor tyrosine kinase)  
148 has been studied extensively in melanoma (26, 27), and in our data, GSEA demonstrated enrichment of  
149 MITF programs and downstream targets in the exophytic melanoma region as compared to MIS (**Fig. 7,**  
150 **A and B**); in MIS, a MITF-low, AXL-high transcriptional state was observed (**Fig. 7A**). Fluorescence  
151 microscopy confirmed higher MITF protein levels in melanocytes within the tumor region relative to  
152 MIS (**Fig. 7, C and D**), but AXL expression in MIS was restricted to the membranes of epithelial  
153 keratinocytes (**Fig. 7E**). Thus, fluorescence microscopy shows that differential AXL gene expression  
154 between MIS and tumor is a consequence of the cellular composition of the mROIs rather than a change  
155 in melanocyte biology, demonstrating the value of combining RNA expression data with protein  
156 expression data.

157 NanoString GeoMx™ DSP is a leading, commercially available method for high-plex, spatial  
158 transcriptomic analysis of FFPE tissues (28, 29). We used it to evaluate the performance of Pick-Seq on  
159 serial sections containing regions of exophytic melanoma and MIS. GeoMx measures the abundance of

160 ~1,800 transcripts: 1,571 of these were detected by Pick-Seq (**Table S4, Fig. 8**). Most of the 94 DEGs  
161 (exophytic melanoma vs. MIS) common to GeoMx and Pick-Seq were concordantly up- or down-  
162 regulated in both assays (**Fig. 9**). Concordance between Pick-Seq and GeoMx strongly suggests that the  
163 two methods correctly capture significant differences between tissue regions. However, Pick-Seq  
164 sampled regions approximately 25-fold smaller in area than GeoMx (40  $\mu\text{m}$  vs.  $\sim$ 200  $\mu\text{m}$  diameter)  
165 while identifying  $\sim$ 2.2-fold more DEGs (FDR < 0.05; **Fig. 9** inset). The 40  $\mu\text{m}$  size of Pick-Seq mROIs  
166 compares favorably to the 100  $\mu\text{m}$  raster used for spatial transcriptomics on frozen specimens (10, 30),  
167 and the depth of sequencing and integration with imaging retains the advantages of other emerging  
168 methods involving “*high-definition spatial transcriptomics*” (31) while extending the application to  
169 fixed specimens.

## 170 **DISCUSSION**

171 The data in this paper establishes that micro-mechanical isolation of tissue mROIs using compact  
172 robotics integrated with multiplexed fluorescence imaging is a simple and sensitive means of spatially-  
173 resolved transcriptional profiling of fixed and frozen tissue. Pick-Seq is sufficiently reliable that in a  
174 typical use case, it proved possible to sequence 75 successive micro-regions spanning multiple tumor  
175 stages and histomorphologies in a single complex melanoma. Pairwise comparison of RNA from  
176 melanoma *in situ*, invasive tumor, and areas of active immunosurveillance identified  $\sim$ 200 to 950 DEGs,  
177 which included genes known to be differentially expressed by tumor stage or extent of lymphocyte  
178 infiltration as well as newly identified genes. In our work on tumor atlases, tight integration of imaging  
179 and transcript profiling is essential, but it is also convenient for the now-common practice of validating  
180 cRNA-Seq or micro-region sequencing (mrSeq) results using immunofluorescence imaging (32).

181 Mechanical isolation avoids complex chemistry and RNA-damaging lasers, and can, in principle,  
182 be used with many different sequencing and imaging approaches; the implementation described here has



183 been commercialized, making it readily accessible. A wide variety of methods are being developed for  
184 spatial transcriptomics of frozen specimens (33), but FFPE tissue presents additional challenges. These  
185 challenges merit overcoming because FFPE tissues are more widely available in research and clinical  
186 settings (including in histopathology archives), better preserve morphology and have fewer pre-  
187 analytical variables; we therefore expect Pick-Seq to have its greatest impact in the analysis of fixed and  
188 archival tissue.

189 In most settings, Pick-Seq is not a true “single-cell” method, but we have shown that it is  
190 possible to pick one cell of interest when it is surrounded by other cell types and deconvolve the data;  
191 with improvements in sequencing technology (e.g. use of Smart-3SEQ or Smart-seq3)(14, 34) and  
192 computation, this may approach single-cell resolution (20). In our specimens, Pick-Seq outperformed  
193 GeoMx, the leading micro-region sequencing (mrSeq) platform, with respect to spatial resolution as well  
194 as the number of DEGs, and both appear to be more sensitive than laser capture microdissection as  
195 usually deployed (35). Implementing different sequencing workflows, including methods for single-cell  
196 sequencing of T-cell receptors (35), represents a direct and potentially impactful extension of the  
197 method described here. We also anticipate continued improvement in Pick-Seq through the use of  
198 smaller needles, faster picking, and integration with whole-slide imaging to enable a straightforward  
199 comparison of molecular and morphological features of normal and diseased tissues. More generally, the  
200 integration of transcript profiling with highly-multiplexed tissue imaging on microscope platforms  
201 promises to substantially advance the goal of linking our understanding of disease genomics with  
202 histopathology for research and diagnostic purposes(5).

## 203 **MATERIALS AND METHODS**

### 204 **Tissue procurement**

205 Frozen breast cancer blocks were obtained from a commercial vendor (Origene, Rockville MD) and  
206 sectioned at a thickness of 10 microns by the University of Washington Pathology Core. FFPE tonsil  
207 sections were obtained from Zyagen (San Diego, CA). Freshly harvested tissue was fixed by the vendor  
208 in 10% neutral buffered formalin and processed for paraffin embedding. Paraffin blocks were sectioned  
209 at a thickness of 5 microns and mounted on positively charged slides.

210 FFPE melanoma sections were obtained under IRB oversight as 5 micron sections from the  
211 archives of the Dermatopathology Core at Brigham and Women's Hospital. The sections originated  
212 from a biopsy removed from a 61 year-old male, non-smoker, with extensive sun exposure. He  
213 presented with a pigmented lesion on his forearm with recurrent intermittent bleeding that became  
214 continuous after a trauma. The patient was also diagnosed with basal cell carcinoma on the right side of  
215 the chest. The clinical pathology reported a malignant melanoma, depth of 14.0 mm, anatomic level IV,  
216 with extensive associated melanoma in situ. Superficial spreading, intraepidermal component, vertical  
217 growth phase, and ulceration were also noted as present. Non-brisk tumor-infiltrating lymphocytes were  
218 observed. There was no report of perineural or vascular invasion. The sample tested negative for BRAF  
219 V600E and PD-L1. This study was approved by the Institutional Review Board of the Harvard Faculty  
220 of Medicine (FWA00007071, Protocol IRB18-1363). A waiver of the requirement to obtain consent was  
221 deemed appropriate.

222

### 223 **Instrumentation**

224 The RareCyte® imaging and picking platform performs four or six-color fluorescence imaging and has a  
225 microscope stage that employs a kinematic mount to ensure highly reproducible positioning of the slide;

226 X–Y displacement upon reloading is approximately 2–3  $\mu\text{m}$ . Scanning of each slide in four channels  
227 takes about 12 min inclusive of image plane determination. The fluid-coupled picking system positions a  
228 needle above the slide stage for retrieval of individual mROIs. The needle tip mechanically dislodges the  
229 tissue region with positive pressure into an imaging tube; visual confirmation of deposition is optional.  
230 The system is automated and does not require high technical skills; the rate of successful cell retrieval is  
231 ~80–90%. Additional feature of the system, originally developed for isolation of circulating tumor cells,  
232 have been described previously (19)

233

### 234 **OCT tissue staining and imaging**

235 Frozen biopsy samples were sectioned 10  $\mu\text{m}$  thick in optimal cutting temperature (OCT) mounting  
236 medium, thawed (25°C, 5 minutes), dehydrated in acetone (-20°C, 10 min), rehydrated in PBS/0.25%  
237 Triton X/0.0025% RNasin Plus (Promega) (twice, 0°C, 3 min each) then washed PBS/0.0025% RNasin  
238 Plus (0°C). Prior to staining slides were blocked with ice-cold blocking buffer 1 (PBS/6% BSA/0.1%  
239 RNasin Plus) for 10 min on ice. Sections were stained with primary antibodies (**Table S5**) and SYTOX  
240 Orange (nuclear stain) diluted in a blocking buffer and incubated on ice for 30 min. After staining, slides  
241 were washed twice for 3 min in ice-cold 1X PBS/0.25% Triton X/0.0025% RNasin Plus, followed by a  
242 wash in ice-cold 1X PBS/0.0025% RNasin Plus. Stained sections were mounted with 1X PBS/0.1%  
243 RNasin Plus and scanned on a CyteFinder instrument to identify regions of interest. Coverslips were  
244 removed, and sections were dehydrated in a series of ice-cold solutions each containing 0.0025%  
245 RNasin Plus: 1X PBS for 1 min, 1X PBS for 1 min, 75% ethanol for 1 min, 95% ethanol for 1 min,  
246 100% ethanol for 1 min. Slides were left in ice-cold 100% ethanol prior to mROI retrieval.

247

248 **FFPE tissue staining and imaging**

249 FFPE sections were deparaffinized and rehydrated using the Histogene Refill Kit (Arcturus). Slides were  
250 immersed in xylene for 10 min, a second jar of xylene for 15 min then incubated in an ethanol series  
251 (100% ethanol for 4 min, 95% ethanol for 4 min, 75% ethanol for 4 min) followed by 1X PBS for 4 min.  
252 For antigen retrieval, slides were incubated in Leica 1X Tris/EDTA pH 9 retrieval solution at 95°C for  
253 10 min, then washed in 1X PBS/0.25% Triton X three times (3 min each wash). To reduce  
254 autofluorescence, slides were submerged in 1X PBS with 4.5% hydrogen peroxide and 24 mM NaOH  
255 and photobleached between two light sources for 1 hr. Slides were washed twice in 1X PBS/0.25%  
256 Triton X (3 min per wash), followed by a 1X PBS wash, and stored overnight at 4°C. Melanoma  
257 sections were dewaxed and subjected to antigen retrieval using a Leica Biosystems BOND RX  
258 automated slide stainer, following the manufacture's protocols.

259         Prior to staining, slides were blocked for 1 hour at room temperature with blocking buffer 2 (1X  
260 PBS/10% goat serum/6% BSA/0.1% PEG). Primary antibodies diluted in blocking buffer 2 (**Table S5**)  
261 were applied to the section and incubated for 1 hr at room temperature. After the primary antibody  
262 incubation, slides were washed two times with 1X PBS/0.25% Triton X (3 min per wash), followed by a  
263 wash with 1X PBS. Secondary antibodies diluted in blocking buffer 2, were applied to the sections and  
264 incubated for 1 hr at room temperature. Slides were then washed twice with 1X PBS/0.25% Triton X (3  
265 min per wash) followed by a wash with 1X PBS. For the second round of staining on the same section,  
266 the above primary antibody incubation step was repeated after a blocking step. To visualize the nuclei,  
267 slides were stained with a 1:100,000 dilution of SYTOX Orange for 15 min at room temperature  
268 followed by two washes in 1X PBS/0.25% Triton X (3 min per wash). Stained sections were mounted  
269 with RareCyte mounting media and coverslip applied. Stained slides were scanned on a CyteFinder  
270 instrument.

271

## 272 **Pick-Seq tissue section preparation**

273 For each FFPE tissue sample, a serial section adjacent to the immunofluorescence (IF) stained section  
274 was prepared for microregion retrieval and downstream RNA-seq analysis. Sections were deparaffinized  
275 and rehydrated using the Histogene Refill Kit. Slides were immersed in xylene for 5 min, followed by  
276 incubation in a second jar of xylene for 5 min. Slides were then incubated in a series of ice-cold  
277 solutions with 0.0025% RNasin Plus (Promega): 100% ethanol for 1 min, 95% ethanol for 1 min, 75%  
278 ethanol for 1 min, 1X PBS for 1 min, and another tube of 1X PBS for 1 min. Slides were stained with 50  
279  $\mu\text{M}$  DRAQ5,<sup>TM</sup> a Far-Red DNA Dye (ThermoFisher) in PBS, with 0.1% RNasin Plus for 2 min on ice.  
280 Sections were dehydrated in a series of ice-cold solutions with 0.0025% RNasin Plus: 1X PBS for 1  
281 min, 1X PBS for 1 min, 75% ethanol for 1 min, 95% ethanol for 1 min, 100% ethanol for 1 min. Slides  
282 were left in ice-cold 100% ethanol prior to microregion retrieval.

283

## 284 **Pick-Seq micro-region retrieval**

285 IF stained sections were evaluated to identify regions of interest for transcriptional analysis (**Table S6**).  
286 Tissue architecture of the IF-stained and DRAQ5-stained sections were compared to identify the  
287 corresponding regions of interest on the DRAQ5-stained slide. Prior to microregion retrieval, slides  
288 were removed from 100% ethanol and allowed to air dry. Slides were loaded into a CyteFinder  
289 instrument (RareCyte), and microregions were retrieved using the integrated CytePicker module with 40  
290  $\mu\text{m}$  diameter needles. Tissue microregions were deposited with 2  $\mu\text{l}$  PBS into PCR tubes containing 18  
291  $\mu\text{l}$  of lysis buffer: 1:16 mix of Proteinase K solution (QIAGEN) in PKD buffer (QIAGEN), with 0.1%  
292 RNasin Plus. After deposit, tubes were immediately placed in dry ice and stored at  $-80^{\circ}\text{C}$  until ready for  
293 downstream RNA-seq workflow.

294

295 **Tissue microregion lysis and mRNA enrichment**

296 PCR tubes containing tissue microregions in the lysis buffer were removed from the freezer, allowed to  
297 thaw at room temperature for 5 min, and incubated at 56°C for 1 hr. Tubes were briefly vortexed, spun  
298 down, and placed on ice. Dynabeads Oligo(dT)<sub>25</sub> beads (ThermoFisher) were washed three times with  
299 ice-cold 1X hybridization buffer (NorthernMax buffer (ThermoFisher) with 0.05% Tween 20 and  
300 0.0025% RNasin Plus) and resuspended in original bead volume with ice-cold 2x hybridization buffer  
301 (NorthernMax buffer with 0.1% Tween 20 and 0.005% RNasin Plus). A volume of 20 µl of washed  
302 beads was added to each lysed sample, mixed by pipette, and incubated at 56°C for 1 min followed by  
303 room temperature incubation for 10 min. Samples were placed on a magnet and washed twice with an  
304 ice-cold 1X hybridization buffer, then once with ice-cold 1X PBS with 0.0025% RNasin Plus. The  
305 supernatant was removed, and the pellet was resuspended in 10.5 µl nuclease-free water. Samples were  
306 incubated at 80°C for 2 min and immediately placed on a magnet. The supernatant was transferred to  
307 new PCR tubes or plates, and placed on ice for subsequent whole transcriptome amplification or stored  
308 at -80°C.

309

310 **Whole transcriptome amplification, RNA-seq library preparation, and sequencing**

311 Reverse transcription and cDNA amplification were performed using the SMART-Seq v4 Ultra Low  
312 Input RNA Kit for Sequencing (Takara Bio, Kusatsu, Shiga, Japan). The resulting amplified cDNA  
313 libraries were assessed for DNA concentration using the Qubit dsDNA HS Assay Kit (ThermoFisher)  
314 and for fragment size distribution using the BioAnalyzer 2100 High Sensitivity DNA Kit (Agilent). The  
315 fragment size distribution is used to determine how to make the cDNA into a sequencing library.  
316 Tissues, where the majority of cDNA was >500 bp in length, was prepared into a library using Nextera

317 tagmentation method (Illumina) while if the majority of the cDNA was <500 bp in length the cDNA was  
318 cleaned up and adapters were ligated following the ThruPLEX method (Takara Bio).

319 cDNA from tonsil and breast cancer tissue microregion samples were prepared into sequencing  
320 libraries using Nextera XT library preparation (Illumina), while cDNA from melanoma microregion  
321 libraries were prepared with ThruPLEX DNA-seq Kit (Takara Bio). The resulting libraries were  
322 quantitated using the Qubit dsDNA HS Assay Kit and quality was assessed on a BioAnalyzer 2100 High  
323 Sensitivity DNA Kit. Libraries were pooled at equimolar ratios and sequenced in-house using an  
324 Illumina MiSeq or on an IlluminaNextSeq at Biopolymers Facility at Harvard Medical School.

325

### 326 **RNA-seq data processing**

327 The raw FASTQ files were examined for quality issues using FastQC  
328 (<http://www.bioinformatics.babraham.ac.uk/projects/fastqc/>) to ensure library generation and sequencing  
329 are suitable for further analysis. The reads were processed using the bcbio pipeline v.1.2.1 software (36).  
330 Briefly, reads were mapped to the GRCh38 human reference genome using HISAT2 (37) and Salmon  
331 (38). Length scaled transcripts per million (TPM) derived from Salmon was passed through the ARSeq  
332 pipeline v.2.2.14 (<https://github.com/ajitjohnson/arseq>) for downstream analysis. The DESeq2 R  
333 package (39) was used to generate the normalized read count table based on their estimateSizeFactors()  
334 function with default parameters by calculating a pseudo-reference sample of the geometric means for  
335 each gene across all samples and then using the "median ratio" of each sample to the pseudo-reference  
336 as the sizeFactor for that sample. The sizeFactor is then applied to each gene's raw count to get the  
337 normalized count for that gene. DESeq2 was also used for differential gene expression analysis. A  
338 corrected P value cut-off of 0.05 was used to assess significant genes that were up-regulated or down-  
339 regulated using Benjamini-Hochberg (BH) method. The combat function from the R package SVA was

340 used to account for batch effects when combining two independent Pick-Seq experiments for assessing  
341 technical reproducibility.

342

### 343 **Pathway enrichment analyses**

344 A compendium of biological and immunological signatures was identified from publicly available  
345 databases or published manuscripts for performing enrichment analysis. To perform gene set enrichment  
346 analysis, two previously published methods (Gene Set Enrichment Analysis (GSEA) (40) and single-  
347 sample GSEA (ssGSEA)) were primarily used. The R package clusterProfiler (41) was used to perform  
348 GSEA and the R package GSVA (42) was used to perform ssGSEA which calculates the degree to  
349 which the genes in a particular gene set are coordinately up- or down-regulated within a sample. The  
350 breast cancer signatures were curated from MsigDB (43), and immune cell-related and melanoma-  
351 related (MITF pathway and AXL pathway) signatures were curated from published studies (32, 44–46).

352

### 353 **CIBERSORT analysis**

354 The normalized counts' table was inverse log<sub>2</sub> transformed and uploaded to the CIBERSORT web app  
355 v1.06 (<https://cibersort.stanford.edu/>) and run with default parameters and quantile normalization  
356 disabled. The LM22 signature was used for inferring cellular proportions. For visualization purposes,  
357 different cell subtypes are combined: mast cells, eosinophils, and neutrophils are represented as  
358 granulocytes; and monocytes and macrophages are represented as mono/macrophages.

359

### 360 **GeoMx analysis**

361 NanoString GeoMx gene expression analysis using the cancer transcriptome array probe set was  
362 performed by the Technology Access Program at NanoString using methods, as previously described



363 (29). Briefly, a 5  $\mu\text{m}$  section of FFPE melanoma was dewaxed and stained overnight for DNA,  
364 melanocytes (PMEL), epithelia (pan-cytokeratin), and immune cells (CD45) to define areas of interest  
365 on the NanoString GeoMx instrument for transcriptional analysis using the human cancer transcriptome  
366 array probe set. Twenty-nine ROIs representing five morphological sites (melanoma in situ, invasive  
367 tumor, invasive tumor margin, brisk tumor-infiltrating lymphocytes, and exophytic melanoma) were  
368 selected. All sample processing and sequencing were performed by the Technology Access Program at  
369 NanoString. Tissue images, probe measurements (**Table S4**), and quality control data were provided by  
370 NanoString, then analyzed using DESeq2 for differential expression analysis.

371

### 372 **Comparison of Pick-Seq and GeoMx**

373 Similar, but not identical, regions were assayed using GeoMx to compare with Pick-Seq (differences in  
374 the areas sampled precluded a one-to-one comparison). Differential gene expression analysis using  
375 DESeq2 compared regions of exophytic melanoma and melanoma in situ. Differentially expressed genes  
376 with an FDR  $< 0.05$  were compared between Pick-Seq and GeoMx. As the dynamic range of expression  
377 scales between the two methods was largely different, we sought to compare them by directional  
378 concordance (i.e. up/downregulation) rather than absolute correlation in fold change. Of the 94 common  
379 differentially expressed genes, seventeen genes were not directionally concordant. However, only two of  
380 those seventeen showed a log-fold change of  $>1$ , suggesting that the 15 others might represent low  
381 expression noise. Together, this analysis suggested that differential gene expression analysis by Pick-  
382 Seq and GeoMx was largely concordant.

383 **SUPPLEMENTARY MATERIALS**

384 **Fig. S1:** Positions of sequence reads

385 **Fig. S2:** Reads mapped and genes detected for mROIs

386 **Table S1:** Normalized gene expression data for tonsil

387 **Table S2:** Normalized gene expression data for breast

388 **Table S3:** Normalized gene expression data for melanoma

389 **Table S4:** Normalized gene expression data for NanoString GeoMx

390 **Table S5:** Antibodies for FFPE tissue staining and imaging

391 **Table S6:** Regions of interest for transcriptional analysis

## 392 REFERENCES

- 393 1. G. D. Hammer, S. J. McPhee, *Pathophysiology of disease: An Introduction to Clinical Medicine*  
394 *7/E* (McGraw-Hill Education, 2014).
- 395 2. D. A. Jaitin, E. Kenigsberg, H. Keren-Shaul, N. Elefant, F. Paul, I. Zaretsky, A. Mildner, N. Cohen,  
396 S. Jung, A. Tanay, I. Amit, Massively parallel single cell RNA-Seq for marker-free decomposition  
397 of tissues into cell types. *Science*. **343**, 776–779 (2014).
- 398 3. D. Grün, A. Lyubimova, L. Kester, K. Wiebrands, O. Basak, N. Sasaki, H. Clevers, A. van  
399 Oudenaarden, Single-cell messenger RNA sequencing reveals rare intestinal cell types. *Nature*.  
400 **525**, 251–255 (2015).
- 401 4. HuBMAP Consortium, The human body at cellular resolution: the NIH Human Biomolecular Atlas  
402 Program. *Nature*. **574**, 187–192 (2019).
- 403 5. O. Rozenblatt-Rosen, A. Regev, P. Oberdoerffer, T. Nawy, A. Hupalowska, J. E. Rood, O.  
404 Ashenberg, E. Cerami, R. J. Coffey, E. Demir, L. Ding, E. D. Esplin, J. M. Ford, J. Goecks, S.  
405 Ghosh, J. W. Gray, J. Guinney, S. E. Hanlon, S. K. Hughes, E. S. Hwang, C. A. Iacobuzio-  
406 Donahue, J. Jané-Valbuena, B. E. Johnson, K. S. Lau, T. Lively, S. A. Mazzilli, D. Pe'er, S.  
407 Santagata, A. K. Shalek, D. Schapiro, M. P. Snyder, P. K. Sorger, A. E. Spira, S. Srivastava, K.  
408 Tan, R. B. West, E. H. Williams, Human Tumor Atlas Network, The Human Tumor Atlas  
409 Network: Charting Tumor Transitions across Space and Time at Single-Cell Resolution. *Cell*. **181**,  
410 236–249 (2020).
- 411 6. N. Rajewsky, G. Almouzni, S. A. Gorski, S. Aerts, I. Amit, M. G. Bertero, C. Bock, A. L.  
412 Bredenoord, G. Cavalli, S. Chiocca, H. Clevers, B. De Strooper, A. Eggert, J. Ellenberg, X. M.  
413 Fernández, M. Figlerowicz, S. M. Gasser, N. Hubner, J. Kjems, J. A. Knoblich, G. Krabbe, P.  
414 Lichter, S. Linnarsson, J.-C. Marine, J. C. Marioni, M. A. Marti-Renom, M. G. Netea, D. Nickel,  
415 M. Nollmann, H. R. Novak, H. Parkinson, S. Piccolo, I. Pinheiro, A. Pombo, C. Popp, W. Reik, S.  
416 Roman-Roman, P. Rosenstiel, J. L. Schultze, O. Stegle, A. Tanay, G. Testa, D. Thanos, F. J. Theis,  
417 M.-E. Torres-Padilla, A. Valencia, C. Vallot, A. van Oudenaarden, M. Vidal, T. Voet, LifeTime  
418 and improving European healthcare through cell-based interceptive medicine. *Nature*. **587**, 377–  
419 386 (2020).
- 420 7. J.-R. Lin, B. Izar, S. Wang, C. Yapp, S. Mei, P. M. Shah, S. Santagata, P. K. Sorger, Highly  
421 multiplexed immunofluorescence imaging of human tissues and tumors using t-CyCIF and  
422 conventional optical microscopes. *eLife Sciences*. **7**, e31657 (2018).
- 423 8. M. Angelo, S. C. Bendall, R. Finck, M. B. Hale, C. Hitzman, A. D. Borowsky, R. M. Levenson, J.  
424 B. Lowe, S. D. Liu, S. Zhao, Y. Natkunam, G. P. Nolan, Multiplexed ion beam imaging of human  
425 breast tumors. *Nat. Med.* **20**, 436–442 (2014).
- 426 9. C. Giesen, H. A. O. Wang, D. Schapiro, N. Zivanovic, A. Jacobs, B. Hattendorf, P. J. Schüffler, D.  
427 Grolimund, J. M. Buhmann, S. Brandt, Z. Varga, P. J. Wild, D. Günther, B. Bodenmiller, Highly  
428 multiplexed imaging of tumor tissues with subcellular resolution by mass cytometry. *Nat. Methods*.  
429 **11**, 417–422 (2014).

- 430 10. P. L. Ståhl, F. Salmén, S. Vickovic, A. Lundmark, J. F. Navarro, J. Magnusson, S. Giacomello, M.  
431 Asp, J. O. Westholm, M. Huss, A. Mollbrink, S. Linnarsson, S. Codeluppi, Å. Borg, F. Pontén, P.  
432 I. Costea, P. Sahlén, J. Mulder, O. Bergmann, J. Lundeberg, J. Frisén, Visualization and analysis of  
433 gene expression in tissue sections by spatial transcriptomics. *Science*. **353**, 78–82 (2016).
- 434 11. J. J. Going, R. F. Lamb, Practical histological microdissection for PCR analysis. *J Pathol*. **179**,  
435 121–124 (1996).
- 436 12. M. R. Emmert-Buck, R. F. Bonner, P. D. Smith, R. F. Chuaqui, Z. Zhuang, S. R. Goldstein, R. A.  
437 Weiss, L. A. Liotta, Laser capture microdissection. *Science*. **274**, 998–1001 (1996).
- 438 13. D. J. Burgess, Spatial transcriptomics coming of age. *Nature Reviews Genetics*. **20**, 317–317  
439 (2019).
- 440 14. J. W. Foley, C. Zhu, P. Jolivet, S. X. Zhu, P. Lu, M. J. Meaney, R. B. West, *Genome Res.*, in press,  
441 doi:10.1101/gr.234807.118.
- 442 15. A. N. Snow, A. A. Stence, J. A. Pruessner, A. D. Bossler, D. Ma, A simple and cost-effective  
443 method of DNA extraction from small formalin-fixed paraffin-embedded tissue for molecular  
444 oncologic testing. *BMC Clin Pathol*. **14**, 30 (2014).
- 445 16. F. Aeffner, M. D. Zarella, N. Buchbinder, M. M. Bui, M. R. Goodman, D. J. Hartman, G. M.  
446 Lujan, M. A. Molani, A. V. Parwani, K. Lillard, O. C. Turner, V. N. P. Vemuri, A. G. Yuil-Valdes,  
447 D. Bowman, Introduction to Digital Image Analysis in Whole-slide Imaging: A White Paper from  
448 the Digital Pathology Association. *J Pathol Inform*. **10**, 9 (2019).
- 449 17. C. for D. and R. Health, Technical Performance Assessment of Digital Pathology Whole Slide  
450 Imaging Devices. *U.S. Food and Drug Administration* (2019), (available at  
451 [http://www.fda.gov/regulatory-information/search-fda-guidance-documents/technical-](http://www.fda.gov/regulatory-information/search-fda-guidance-documents/technical-performance-assessment-digital-pathology-whole-slide-imaging-devices)  
452 [performance-assessment-digital-pathology-whole-slide-imaging-devices](http://www.fda.gov/regulatory-information/search-fda-guidance-documents/technical-performance-assessment-digital-pathology-whole-slide-imaging-devices)).
- 453 18. D. E. Campton, A. B. Ramirez, J. J. Nordberg, N. Drovetto, A. C. Clein, P. Varshavskaya, B. H.  
454 Friemel, S. Quarre, A. Breman, M. Dorschner, S. Blau, C. A. Blau, D. E. Sabath, J. L. Stilwell, E.  
455 P. Kaldjian, High-recovery visual identification and single-cell retrieval of circulating tumor cells  
456 for genomic analysis using a dual-technology platform integrated with automated  
457 immunofluorescence staining. *BMC Cancer*. **15**, 360 (2015).
- 458 19. E. P. Kaldjian, A. B. Ramirez, Y. Sun, D. E. Campton, J. L. Werbin, P. Varshavskaya, S. Quarre,  
459 T. George, A. Madan, C. A. Blau, R. Seubert, The RareCyte® platform for next-generation  
460 analysis of circulating tumor cells. *Cytometry A*. **93**, 1220–1225 (2018).
- 461 20. B. Chen, M. S. Khodadoust, C. L. Liu, A. M. Newman, A. A. Alizadeh, Profiling tumor infiltrating  
462 immune cells with CIBERSORT. *Methods Mol Biol*. **1711**, 243–259 (2018).
- 463 21. E. M. Wohlford, P. C. Baresel, J. R. Wilmore, A. J. Mortelliti, C. B. Coleman, R. Rochford,  
464 Changes in Tonsil B Cell Phenotypes and EBV Receptor Expression in Children Under 5-Years-  
465 Old. *Cytometry B Clin Cytom*. **94**, 291–301 (2018).

- 466 22. F. D'Acquisto, A. Merghani, E. Lecona, G. Rosignoli, K. Raza, C. D. Buckley, R. J. Flower, M.  
467 Perretti, Annexin-1 modulates T-cell activation and differentiation. *Blood*. **109**, 1095–1102 (2007).
- 468 23. N. Bossel Ben-Moshe, S. Gilad, G. Perry, S. Benjamin, N. Balint-Lahat, A. Pavlovsky, S. Halperin,  
469 B. Markus, A. Yosepovich, I. Barshack, E. N. Gal-Yam, E. Domany, B. Kaufman, M. Dadiani,  
470 mRNA-seq whole transcriptome profiling of fresh frozen versus archived fixed tissues. *BMC*  
471 *Genomics*. **19** (2018), doi:10.1186/s12864-018-4761-3.
- 472 24. A. R. Bresnick, D. J. Weber, D. B. Zimmer, S100 proteins in cancer. *Nat Rev Cancer*. **15**, 96–109  
473 (2015).
- 474 25. A. Lupia, S. Peppicelli, E. Witort, F. Bianchini, V. Carloni, N. Pimpinelli, C. Urso, L. Borgognoni,  
475 S. Capaccioli, L. Calorini, M. Lulli, CD63 Tetraspanin Is a Negative Driver of Epithelial-to-  
476 Mesenchymal Transition in Human Melanoma Cells. *Journal of Investigative Dermatology*. **134**,  
477 2947–2956 (2014).
- 478 26. J. Müller, O. Krijgsman, J. Tsoi, L. Robert, W. Hugo, C. Song, X. Kong, P. A. Possik, P. D. M.  
479 Cornelissen-Steijger, M. H. G. Foppen, K. Kemper, C. R. Goding, U. McDermott, C. Blank, J.  
480 Haanen, T. G. Graeber, A. Ribas, R. S. Lo, D. S. Peeper, Low MITF/AXL ratio predicts early  
481 resistance to multiple targeted drugs in melanoma. *Nature Communications*. **5**, 5712 (2014).
- 482 27. C. Levy, M. Khaled, D. E. Fisher, MITF: master regulator of melanocyte development and  
483 melanoma oncogene. *Trends in Molecular Medicine*. **12**, 406–414 (2006).
- 484 28. B. A. Helmink, S. M. Reddy, J. Gao, S. Zhang, R. Basar, R. Thakur, K. Yizhak, M. Sade-Feldman,  
485 J. Blando, G. Han, V. Gopalakrishnan, Y. Xi, H. Zhao, R. N. Amaria, H. A. Tawbi, A. P. Cogdill,  
486 W. Liu, V. S. LeBleu, F. G. Kugeratski, S. Patel, M. A. Davies, P. Hwu, J. E. Lee, J. E.  
487 Gershenwald, A. Lucci, R. Arora, S. Woodman, E. Z. Keung, P.-O. Gaudreau, A. Reuben, C. N.  
488 Spencer, E. M. Burton, L. E. Haydu, A. J. Lazar, R. Zapassodi, C. W. Hudgens, D. A. Ledesma, S.  
489 Ong, M. Bailey, S. Warren, D. Rao, O. Krijgsman, E. A. Rozeman, D. Peeper, C. U. Blank, T. N.  
490 Schumacher, L. H. Butterfield, M. A. Zelazowska, K. M. McBride, R. Kalluri, J. Allison, F.  
491 Petitprez, W. H. Fridman, C. Sautès-Fridman, N. Hacohen, K. Rezvani, P. Sharma, M. T. Tetzlaff,  
492 L. Wang, J. A. Wargo, B cells and tertiary lymphoid structures promote immunotherapy response.  
493 *Nature*. **577**, 549–555 (2020).
- 494 29. D. R. Zollinger, S. E. Lingle, K. Sorg, J. M. Beechem, C. R. Merritt, GeoMx™ RNA Assay: High  
495 Multiplex, Digital, Spatial Analysis of RNA in FFPE Tissue. *Methods Mol. Biol.* **2148**, 331–345  
496 (2020).
- 497 30. R. Moncada, D. Barkley, F. Wagner, M. Chiodin, J. C. Devlin, M. Baron, C. H. Hajdu, D. M.  
498 Simeone, I. Yanai, Integrating microarray-based spatial transcriptomics and single-cell RNA-seq  
499 reveals tissue architecture in pancreatic ductal adenocarcinomas. *Nat. Biotechnol.* **38**, 333–342  
500 (2020).
- 501 31. S. Vickovic, G. Eraslan, F. Salmén, J. Klughammer, L. Stenbeck, D. Schapiro, T. Äijö, R.  
502 Bonneau, L. Bergensträhle, J. F. Navarro, J. Gould, G. K. Griffin, Å. Borg, M. Ronaghi, J. Frisén,  
503 J. Lundeberg, A. Regev, P. L. Ståhl, High-definition spatial transcriptomics for in situ tissue  
504 profiling. *Nature Methods*. **16**, 987–990 (2019).

- 505 32. I. Tirosh, B. Izar, S. M. Prakadan, M. H. Wadsworth 2nd, D. Treacy, J. J. Trombetta, A. Rotem, C.  
506 Rodman, C. Lian, G. Murphy, M. Fallahi-Sichani, K. Dutton-Regester, J. R. Lin, O. Cohen, P.  
507 Shah, D. Lu, A. S. Genshaft, T. K. Hughes, C. G. Ziegler, S. W. Kazer, A. Gaillard, K. E. Kolb, A.  
508 C. Villani, C. M. Johannessen, A. Y. Andreev, E. M. Van Allen, M. Bertagnolli, P. K. Sorger, R. J.  
509 Sullivan, K. T. Flaherty, D. T. Frederick, J. Jane-Valbuena, C. H. Yoon, O. Rozenblatt-Rosen, A.  
510 K. Shalek, A. Regev, L. A. Garraway, Dissecting the multicellular ecosystem of metastatic  
511 melanoma by single-cell RNA-seq. *Science*. **352**, 189–196 (2016).
- 512 33. J. R. Moffitt, D. Bambah-Mukku, S. W. Eichhorn, E. Vaughn, K. Shekhar, J. D. Perez, N. D.  
513 Rubinstein, J. Hao, A. Regev, C. Dulac, X. Zhuang, Molecular, Spatial and Functional Single-Cell  
514 Profiling of the Hypothalamic Preoptic Region. *Science*. **362** (2018), doi:10.1126/science.aau5324.
- 515 34. R. Burgemeister, Laser capture microdissection of FFPE tissue sections bridging the gap between  
516 microscopy and molecular analysis. *Methods Mol. Biol.* **724**, 105–115 (2011).
- 517 35. M. De Simone, G. Rossetti, M. Pagani, Single Cell T Cell Receptor Sequencing: Techniques and  
518 Future Challenges. *Front. Immunol.* **9** (2018), doi:10.3389/fimmu.2018.01638.
- 519 36. B. Chapman, R. Kirchner, L. Pantano, S. Naumenko, M. D. Smet, L. Beltrame, T. Khotiainsteva, I.  
520 Sytchev, R. V. Guimera, J. Kern, C. Brueffer, V. Savelyev, G. Carrasco, M. Giovacchini, M.  
521 Ahdesmaki, P. Tang, Sehrish Kanwal, J. J. Porter, S. Möller, Vang Le, A. Coman, Bogdang989, V.  
522 Svensson, B. Pedersen, J. Hammerbacher, M. Edwards, M. Mistry, Apastore, P. Cock, S. Turner,  
523 *bcbio/bcbio-nextgen: v1.2.6* (Zenodo, 2021; <https://zenodo.org/record/3564938>).
- 524 37. D. Kim, J. M. Paggi, C. Park, C. Bennett, S. L. Salzberg, Graph-based genome alignment and  
525 genotyping with HISAT2 and HISAT-genotype. *Nat Biotechnol.* **37**, 907–915 (2019).
- 526 38. R. Patro, G. Duggal, M. I. Love, R. A. Irizarry, C. Kingsford, Salmon provides fast and bias-aware  
527 quantification of transcript expression. *Nat Methods.* **14**, 417–419 (2017).
- 528 39. M. I. Love, W. Huber, S. Anders, Moderated estimation of fold change and dispersion for RNA-  
529 seq data with DESeq2. *Genome Biol.* **15**, 550 (2014).
- 530 40. A. Subramanian, P. Tamayo, V. K. Mootha, S. Mukherjee, B. L. Ebert, M. A. Gillette, A.  
531 Paulovich, S. L. Pomeroy, T. R. Golub, E. S. Lander, J. P. Mesirov, Gene set enrichment analysis:  
532 a knowledge-based approach for interpreting genome-wide expression profiles. *Proc Natl Acad Sci*  
533 *U S A.* **102**, 15545–50 (2005).
- 534 41. G. Yu, L.-G. Wang, Y. Han, Q.-Y. He, clusterProfiler: an R Package for Comparing Biological  
535 Themes Among Gene Clusters. *OMICS: A Journal of Integrative Biology.* **16**, 284–287 (2012).
- 536 42. S. Hänzelmann, R. Castelo, J. Guinney, GSVA: gene set variation analysis for microarray and  
537 RNA-Seq data. *BMC Bioinformatics.* **14**, 7 (2013).
- 538 43. A. Liberzon, A. Subramanian, R. Pinchback, H. Thorvaldsdóttir, P. Tamayo, J. P. Mesirov,  
539 Molecular signatures database (MSigDB) 3.0. *Bioinformatics.* **27**, 1739–1740 (2011).

- 540 44. A. J. Nirmal, T. Regan, B. B. Shih, D. A. Hume, A. H. Sims, T. C. Freeman, Immune Cell Gene  
541 Signatures for Profiling the Microenvironment of Solid Tumors. *Cancer Immunol Res.* **6**, 1388–  
542 1400 (2018).
- 543 45. A. M. Newman, C. L. Liu, M. R. Green, A. J. Gentles, W. Feng, Y. Xu, C. D. Hoang, M. Diehn, A.  
544 A. Alizadeh, Robust enumeration of cell subsets from tissue expression profiles. *Nat Methods.* **12**,  
545 453–457 (2015).
- 546 46. B. B. Shih, A. J. Nirmal, D. J. Headon, A. N. Akbar, N. A. Mabbott, T. C. Freeman, Derivation of  
547 marker gene signatures from human skin and their use in the interpretation of the transcriptional  
548 changes associated with dermatological disorders. *J. Pathol.* **241**, 600–613 (2017).

549

550 **ACKNOWLEDGEMENTS**

551 We thank Jerry Lin for scientific advice and technical assistance and NanoString Inc. for the acquisition  
552 of GeoMx DSP data via its Technology Access Program.

553

554 **Funding:**

555 National Institutes of Health, NCI grant U54-CA225088 (PKS)

556 National Institutes of Health, NCI grant R41-CA224503 (PKS, EPK)

557 National Institutes of Health, NCI grant R35-CA231958 (DMW)

558 Ludwig Cancer Research Foundation (PKS, SS)

559

560 **Author contributions:**

561 Study design: ZM, YAC, AJN

562 Quantitative data analysis: AJN, YAC

563 Data collection: ZM, NGE, LU, RP, JC, YAC, SAB

564 Pathology analysis and image review: CGL, GFM, SS

565 Supervision: DMW, EPK, SS, PKS

566 Writing: ZM, AJN, AAC, PKS

567 Manuscript was read and approved by all authors.

568

569 **Competing interests:** NE, LU, RP, JC, and EJK are or have been employees of RareCyte Inc. PKS is a  
570 member of the SAB or BOD of Applied BioMath, RareCyte Inc., and Glencoe Software, which  
571 distributes a commercial version of the OMERO database; PKS is also a member of the NanoString  
572 SAB. SS is a consultant for RareCyte Inc. All other authors declare they have no competing interests.



573

574 **Data and materials availability:** Raw sequence data and processed counts table can be accessed from

575 NCBI's GEO repository under accession GSE158564. All code has been deposited on GitHub at

576 <https://github.com/sorgerlab>.

577 **FIGURES**

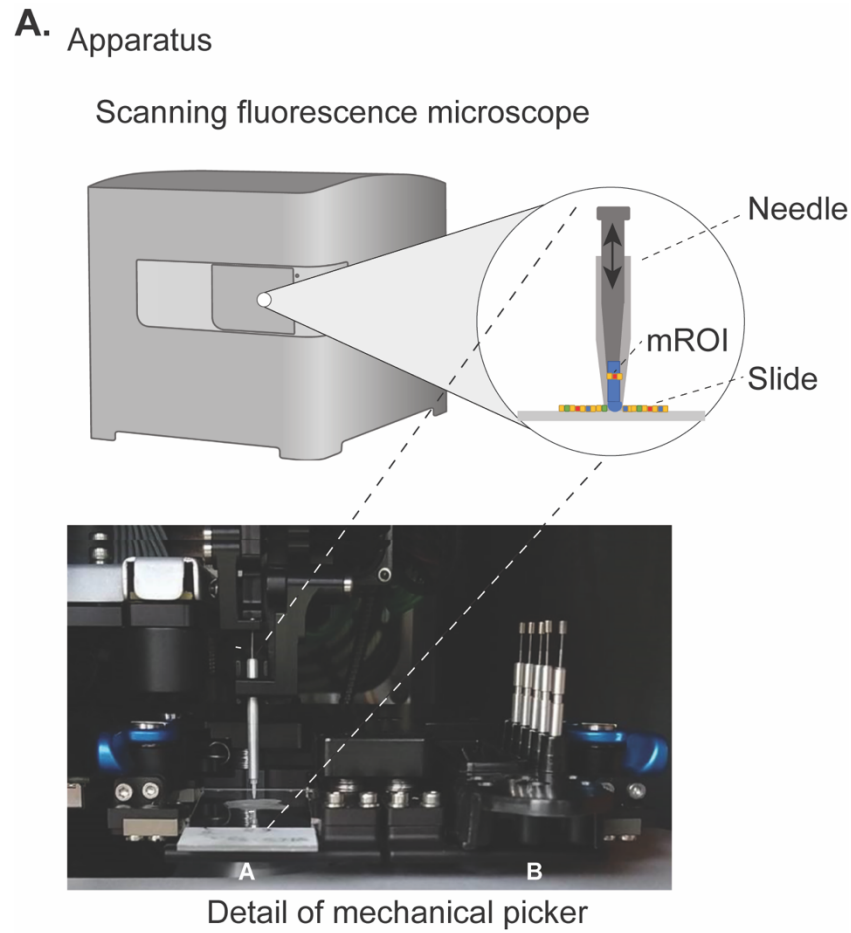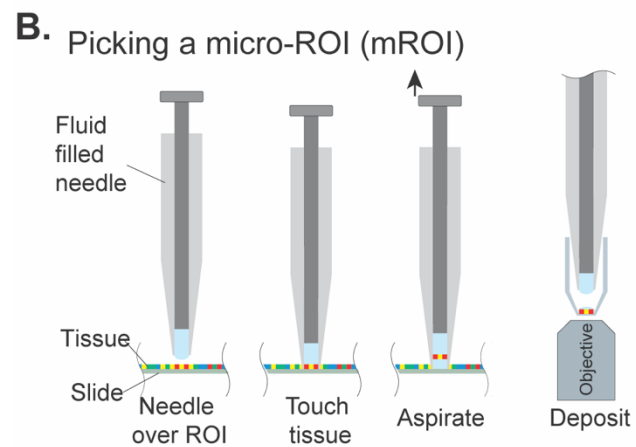

578

579 **Fig. 1: Pick-Seq technology and retrieval of micro-regions from tissue sections**

580 **(A)** External drawing of the RareCyte CyteFinder fluorescence slide scanning microscope (left), a

581 schematic of the picker needle (middle), and a photograph of a needle mounted on a robotic arm above a

582 target slide in stage position A and spare needles and target tubes in position B (right). **(B)** Schematic of  
583 mROI retrieval. A fluid-filled needle attached to a robotic arm recovers tissue from a mROI. Sample  
584 recovery can be confirmed by imaging the PCR tube if desired.

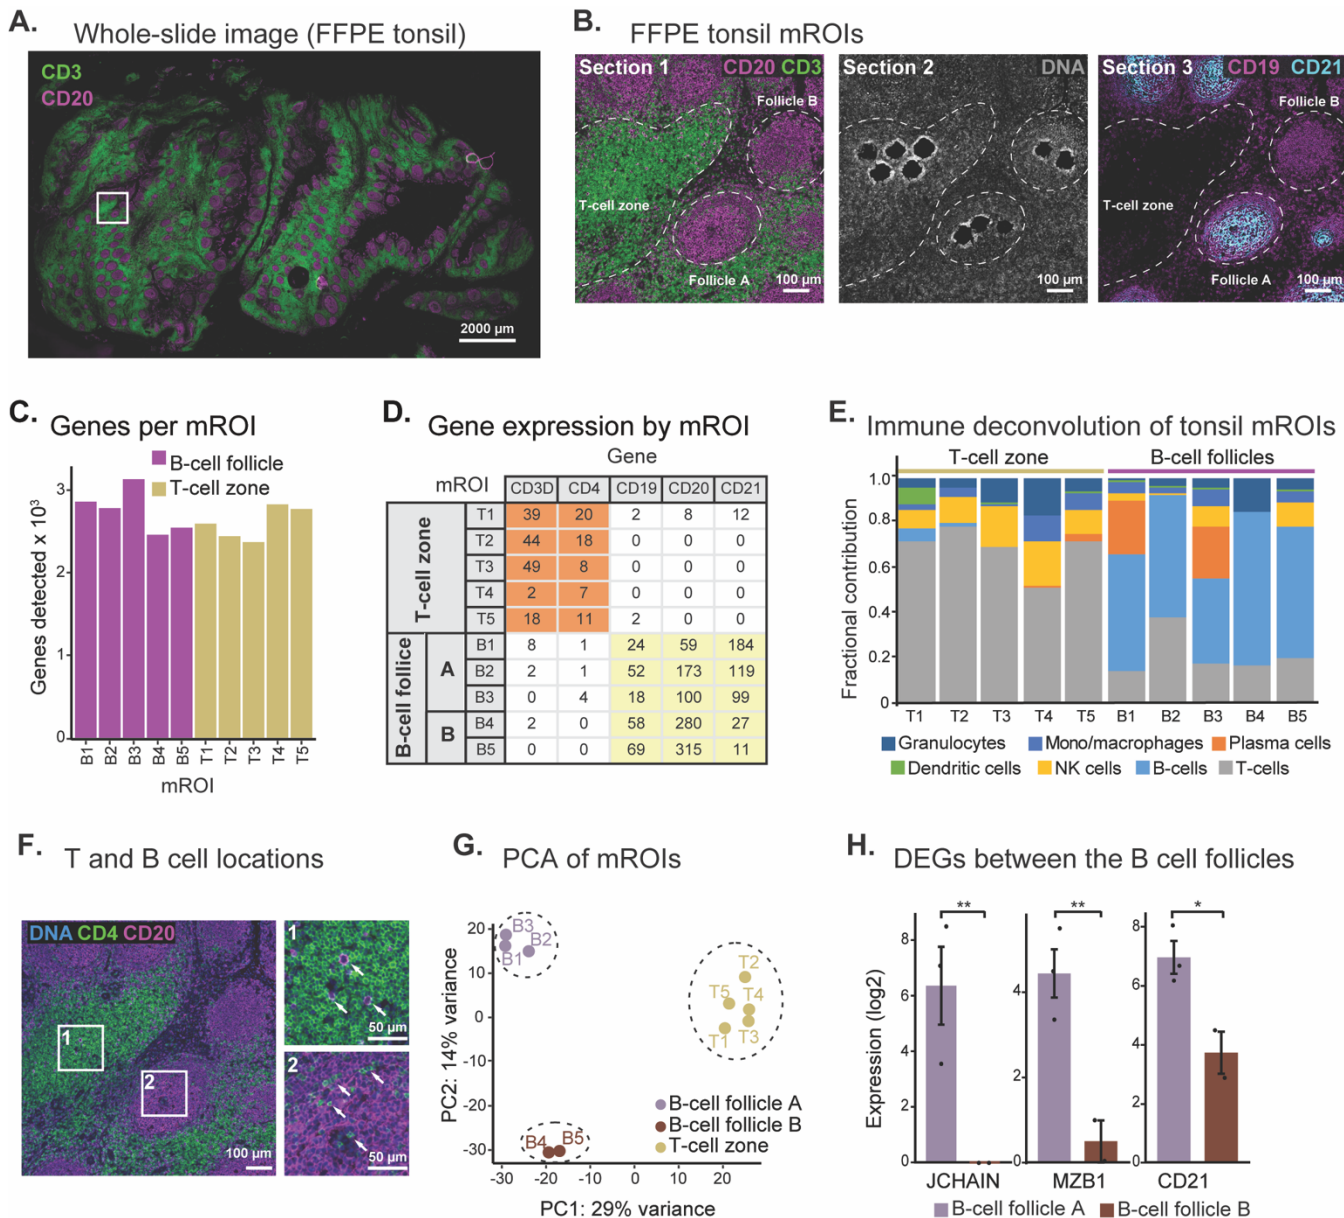

585

586 **Fig. 2: Pick-Seq analysis of an FFPE tonsil tissue section**

587 (A) Whole slide fluorescence microscopy of a 5 μm thick FFPE tonsil section stained for T (CD3:  
 588 green) and B (CD20: violet) cells. Scale bar, 2000 μm. (B) Inset region from Fig. 2A (left);  
 589 corresponding region of the adjacent 5 μm thick FFPE tissue section after mROI recovery, stained to  
 590 visualize nuclear DNA (DRAQ5: gray) (center); the next adjacent section was stained for a lineage  
 591 marker of B cells (CD19: violet) and tonsil follicular DEG (CD21: cyan) (right). Histologic features in

592 tonsil that guide picking are outlined (dotted lines). Scale bars, 100  $\mu$ m. **(C)** Number of genes detected  
593 in each mROI extracted from FFPE tonsil. **(D)** Expression (transcripts per million; TPM) of selected cell  
594 lineage genes in each mROI. **(E)** Immune cell deconvolution for each tonsil mROI transcriptome using  
595 CIBERSORT LM22 signature. **(F)** Left, fluorescence microscopy of FFPE tonsil stained for DNA  
596 (blue), helper T cells (CD4: green), and B cells (CD20: purple). Scale bar, 100  $\mu$ m. Right, insets 1 and 2.  
597 Arrows indicate scattered B-cells in T-cell zone (top) and T cells in B-cell follicle (bottom). Scale bars,  
598 50  $\mu$ m. **(G)** Principal component analysis (PCA) of tonsil mROI transcriptome data colored by  
599 histologic feature: B-cell follicle A (violet), B-cell follicle B (brown), and T-cell zone (yellow). **(H)**  
600 Expression of selected DEGs (JCHAIN, MZB1, and CD21) in mROIs from B-cell follicles A (n=3;  
601 violet) and B (n=2; brown). Data is mean  $\pm$  SEM. \*P<0.01; \*\*P<0.05.

602

**A.** Breast cancer mROIs

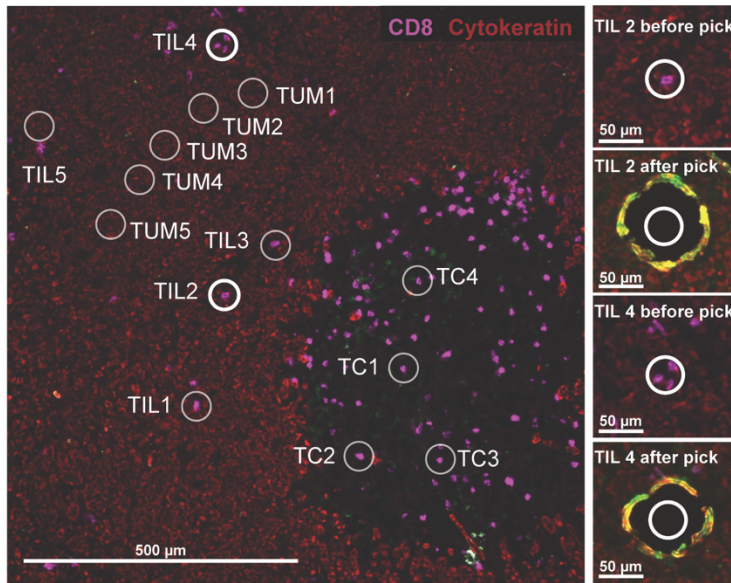

**B.** Genes detected per mROI

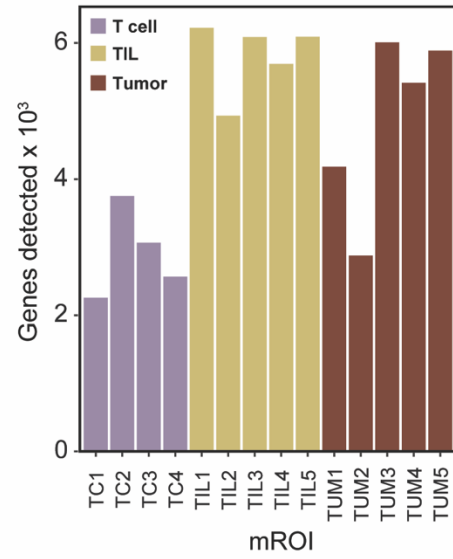

**C.** ssGSEA

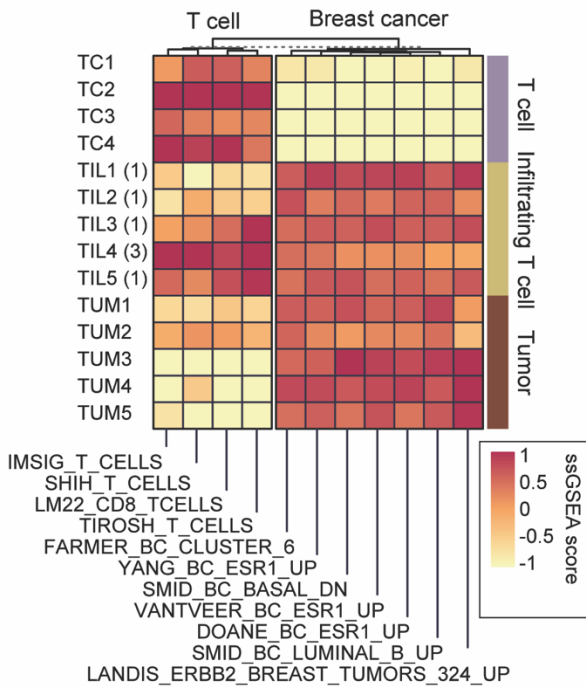

**D.** DEGs between mROIs

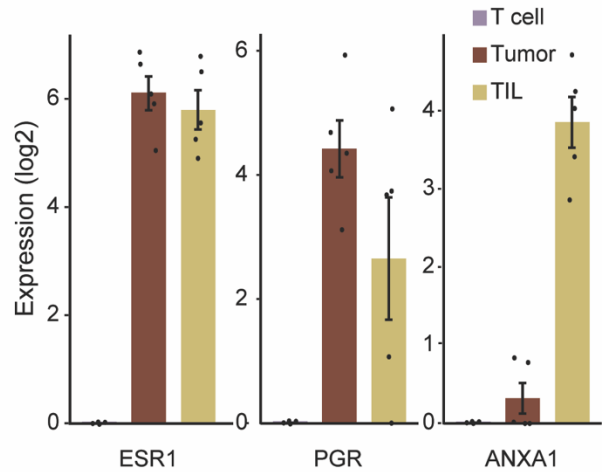

603  
604

605 **Fig. 3: Pick-Seq of a frozen breast cancer surgical biopsy specimen**

606 **(A)** Fluorescence microscopy of a 10  $\mu\text{m}$  thick frozen section of breast cancer surgical biopsy (left)  
607 stained for tumor (cytokeratin: red) and cytotoxic T cells (CD8: magenta). Numbered mROIs are  
608 indicated as tumor (TUM), T cell (TC), and TIL. Scale bar, 500  $\mu\text{m}$ . Magnified mROI containing  
609 regions before and after sample recovery of TIL2 and TIL4 samples (right). Yellow ring is due to  
610 localized tissue compaction from picking and reflects the size of the picking needle. Scale bars, 50  $\mu\text{m}$ .

611 **(B)** Number of genes detected in each mROI recovered from frozen breast cancer section. Samples are  
612 coded by tissue microenvironments: T cell (TC, purple), TIL (yellow), and tumor (TUM, brown). **(C)**  
613 Single-sample gene sample enrichment analysis (ssGSEA) of mROI-derived sequence data for breast  
614 cancer (BC) and T cell related gene signatures. Number of T cells in each TIL mROI is indicated  
615 (parentheses). ssGSEA scores highlight enrichment of breast cancer-related gene signatures in tumor  
616 mROIs and T cell related signatures in the T cell rich mROIs. **(D)** Expression of selected cancer-related  
617 genes in T-cell (n=4; purple), tumor (n=5, brown), and TIL (n=5; yellow) mROIs recovered from breast  
618 tumor sample. Data is mean  $\pm$  SEM.

**A.** Melanoma in situ (MIS) mROIs

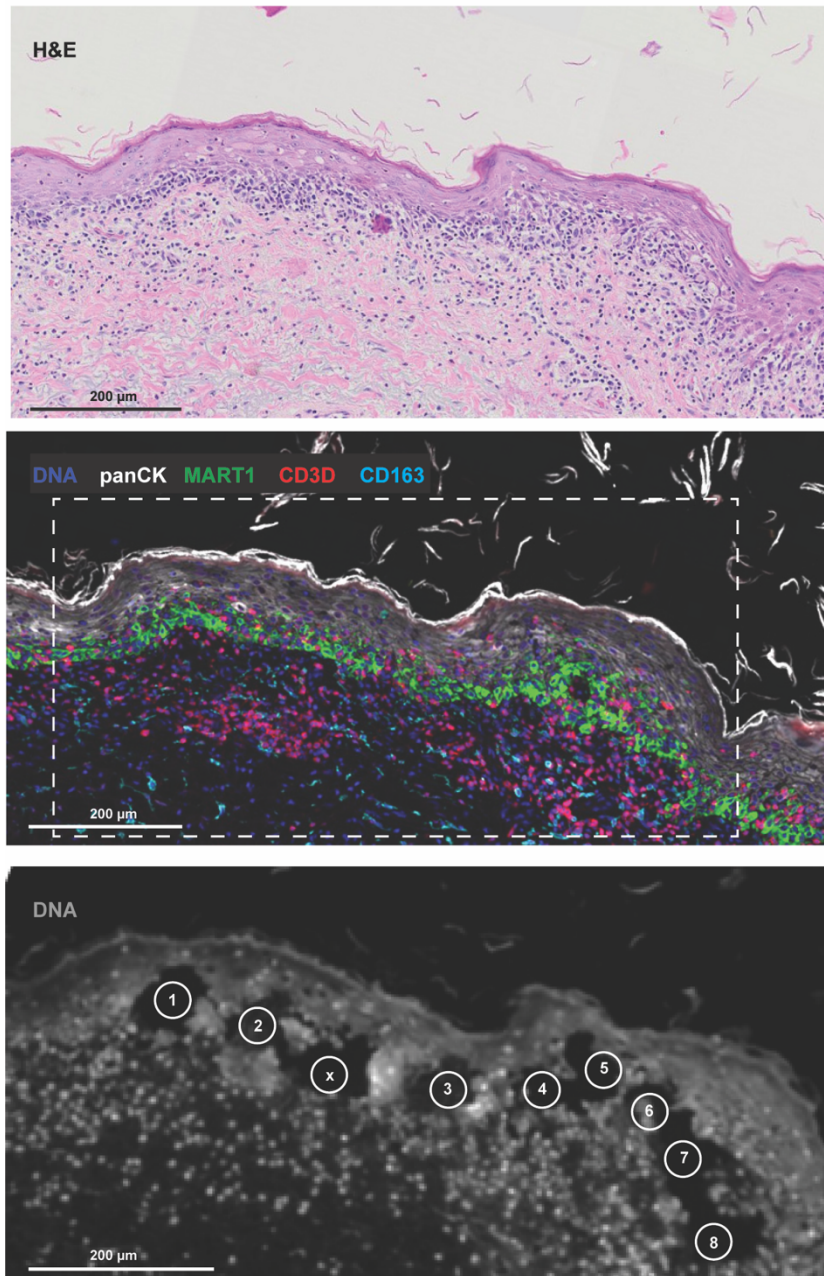

**B.** MIS, tumor, and brisk TIL regions

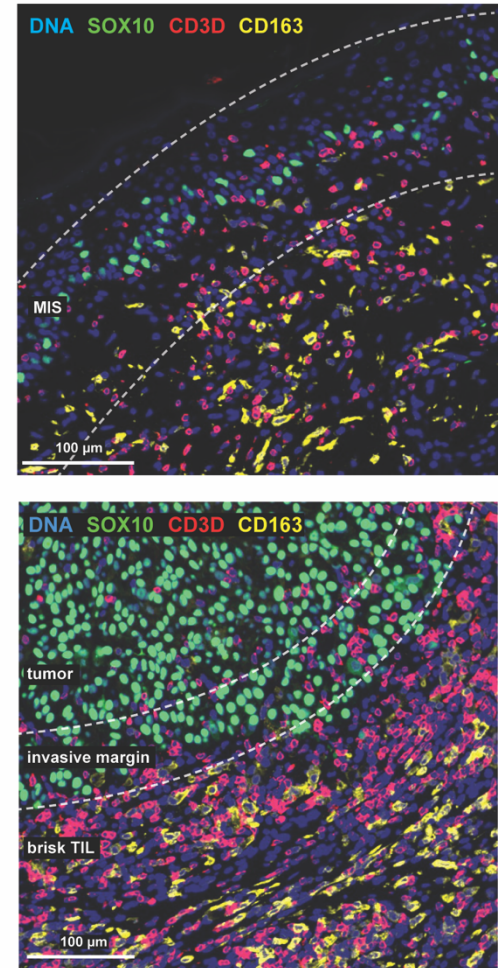

619

620 **Fig. 4: A complex archival melanoma FFPE specimen**

621 **(A)** H&E (top panel) and fluorescence microscopy (middle panel) images of a melanoma in situ (MIS)  
622 region stained for DNA (blue), keratinocytes (cytokeratin: white), melanocytes (MART1: green), T cells  
623 (CD3D: red), and macrophages (CD163: cyan). Magnified corresponding region (bottom panel) in an  
624 adjacent tissue section stained for DNA (DRAQ5: gray). Sites of MIS mROI extraction are indicated.



625 Scale bars, 200  $\mu\text{m}$ . **(B)** Fluorescence microscopy images of histologic features in melanoma tissue  
626 stained for DNA (blue), melanocytes (SOX10: green), T cells (CD3D: red), and macrophages (CD163:  
627 yellow). Top, a region of melanoma in situ. Bottom, a region of invasive melanoma containing tumor  
628 center, invasive margin, and adjacent brisk TIL region. Scale bars, 100  $\mu\text{m}$ .

### A. PCA of all mROIs

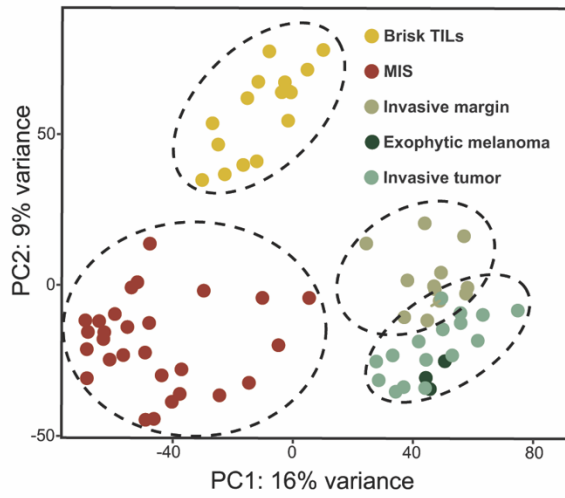

### B. Differentially expressed genes (tumor v. MIS)

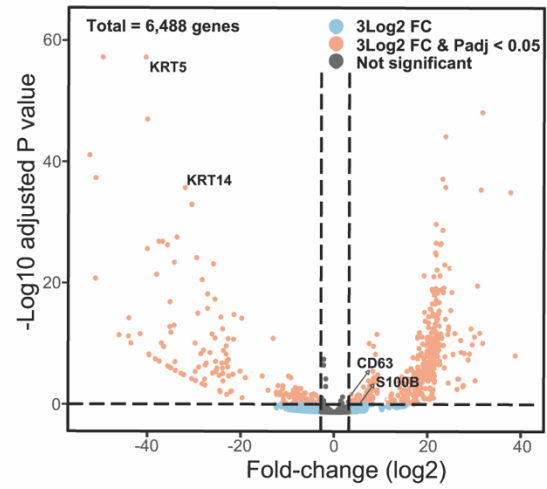

### C. DEGs in histologic regions

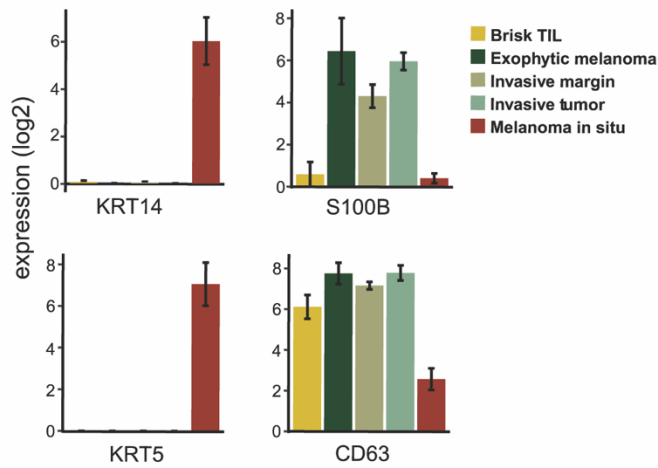

### D. CyCIF imaging

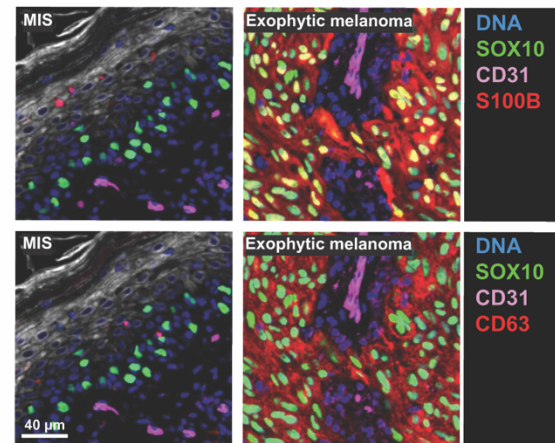

### E. Reproducibility across batches

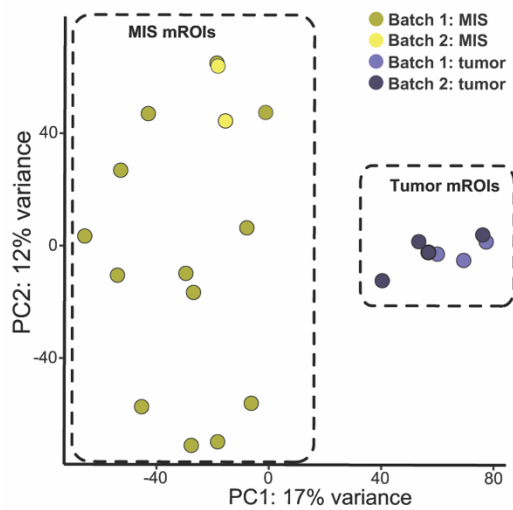

### F. Differentially expressed genes

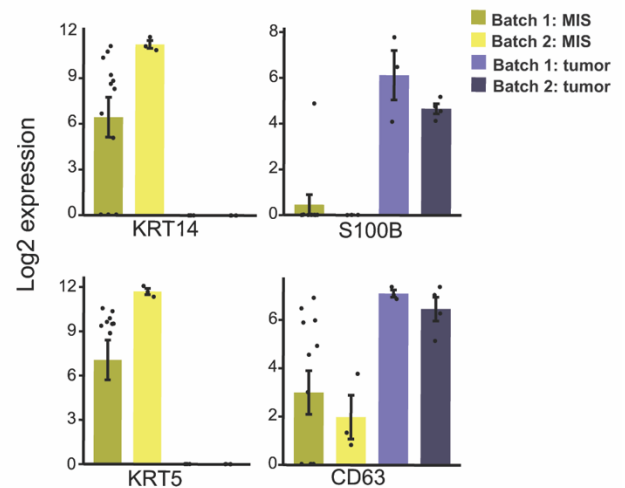

630 **Fig. 5: Pick-Seq of archival FFPE melanoma specimen examining transcriptional differences**  
631 **associated with distinct tumor domains**

632 **(A)** Principal component analysis (PCA) of melanoma mROI transcriptomes. Colors indicate regional  
633 histopathology: brisk TIL (BTIL: yellow), MIS (red), invasive margin (IM: olive green), exophytic  
634 melanoma (EM: dark green), and center of invasive melanoma tumor (IT: light green). EM and IT are  
635 considered tumor samples in this analysis. **(B)** Fold-difference and significance for expression of 6,488  
636 genes between tumor (n=19) and MIS (n=28) samples. DEGs above (blue) and below (orange) a  
637 significance threshold (P-adjusted = 0.05) are indicated. **(C)** Expression of selected genes (KRT14,  
638 KRT5, S100B, and CD63) in each histologic region of melanoma (same mROIs as **(A)**). Mean  $\pm$  SEM  
639 for mROIs of same histology. **(D)** Fluorescence microscopy image of MIS (left) and exophytic  
640 melanoma (right) stained for DNA (blue), melanocytes (SOX10: green), blood vessels (CD31: violet),  
641 and S100B (red, top panel) or CD63 (red, bottom panel). Scale bar, 40  $\mu$ m. **(E)** Principal component  
642 analysis (PCA) of mROIs retrieved from exophytic melanoma tumor (purple) or MIS regions (yellow)  
643 from different tissue sections of the same patient in separate experiments. Samples are coded by batch  
644 and histologic feature. **(F)** Expression of selected genes (KRT14, KRT5, S100B, and CD63) in  
645 exophytic melanoma tumor (purple) or MIS (yellow) mROIs. Mean  $\pm$  SEM for mROIs of same  
646 histology.

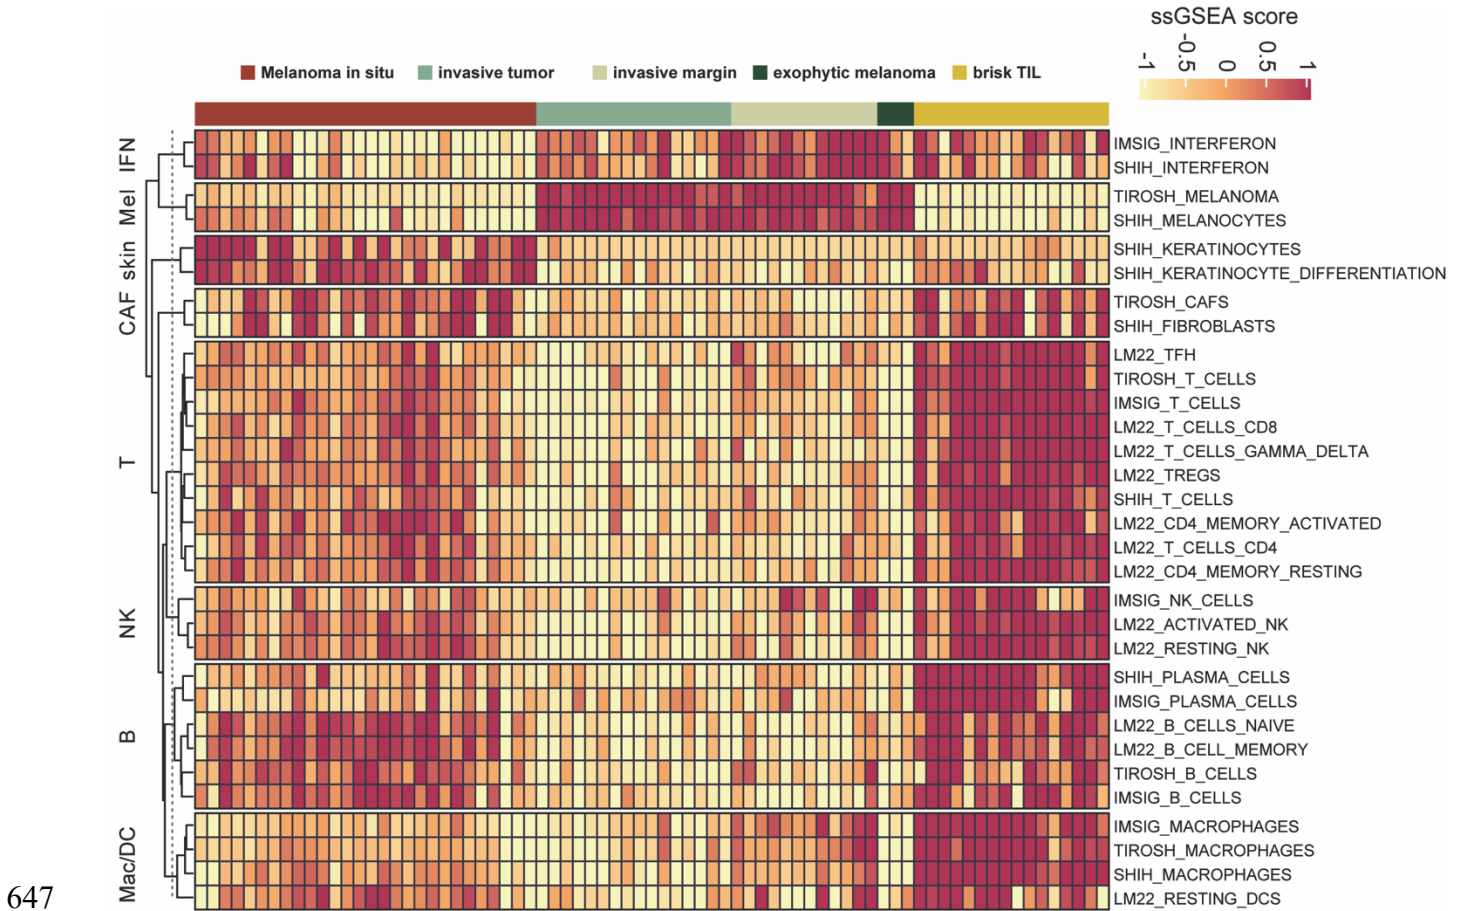

648 **Fig. 6: ssGSEA of immune signatures for melanoma mROIs**

649 Single-sample gene set enrichment analysis (ssGSEA) for immune cell, skin, and melanoma-related  
 650 gene signatures (rows) in mROIs of similar histology (columns) from FFPE melanoma.

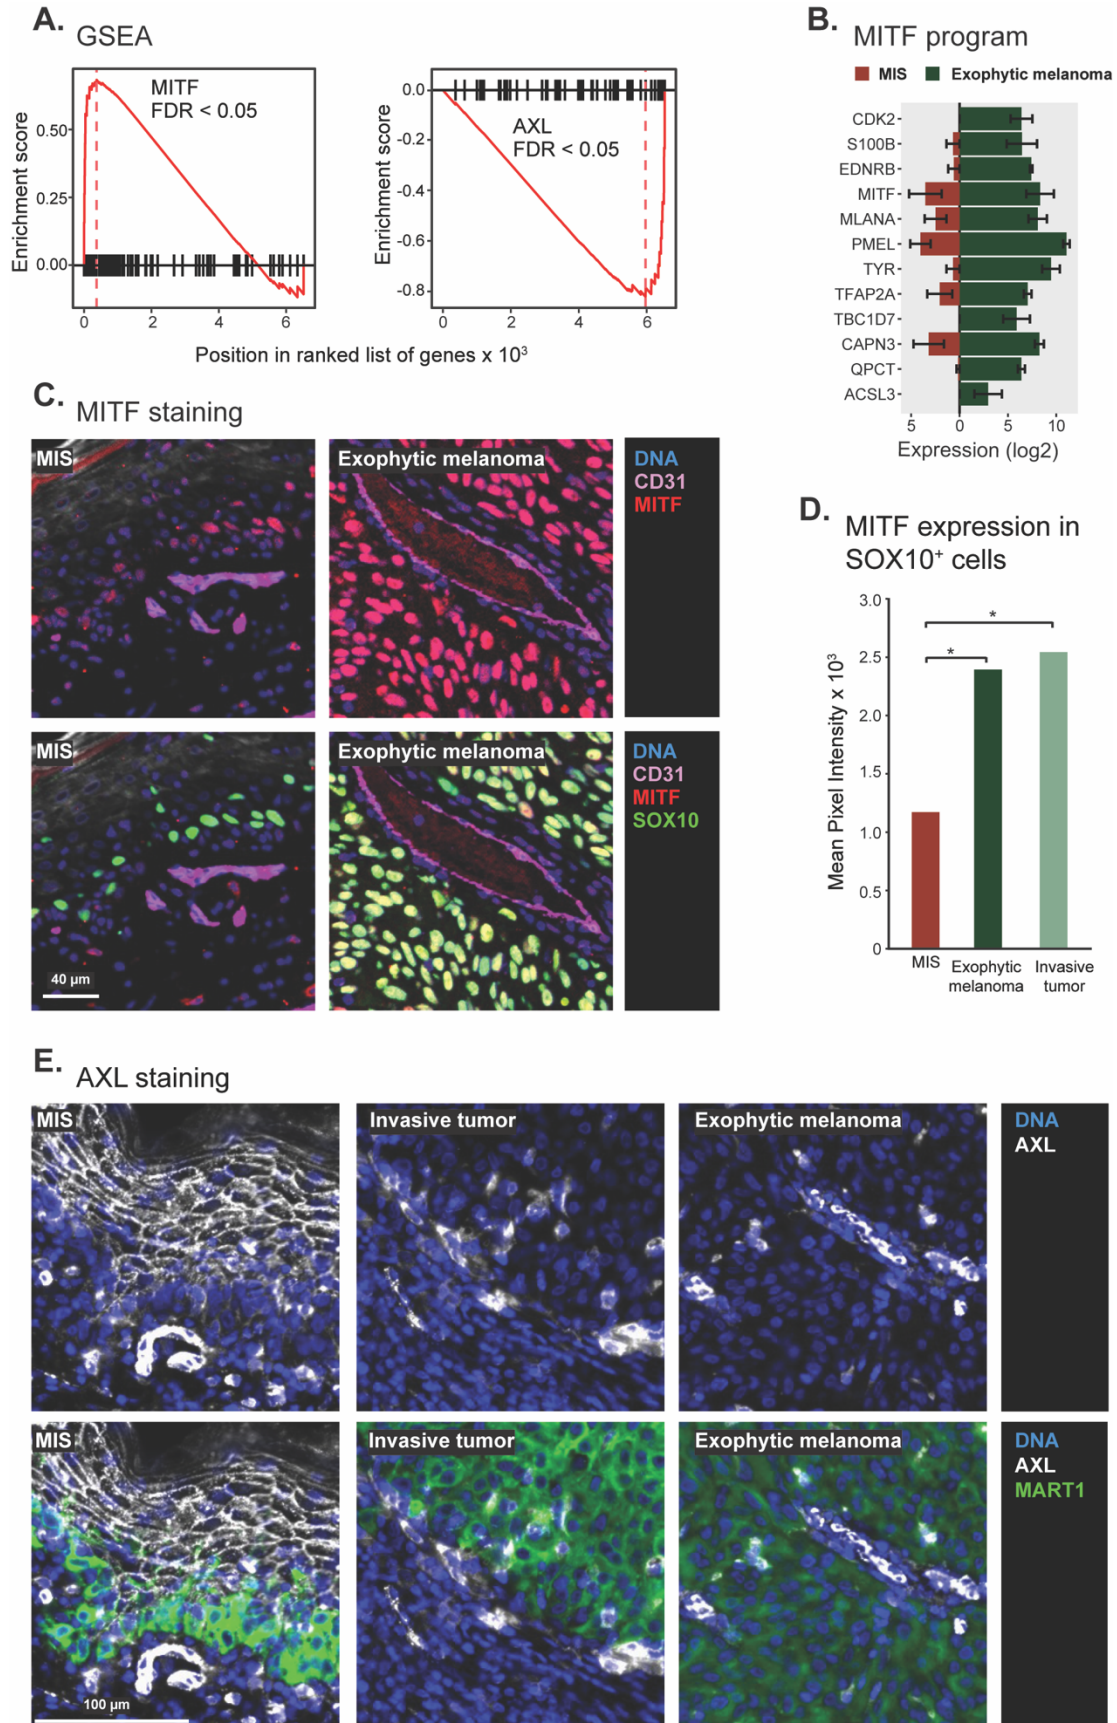

652 **Fig. 7: Analysis of transcriptional signatures in melanoma**

653 **(A)** Gene set enrichment analysis for MITF pathway (left panel) and AXL pathway (right panel) in  
654 exophytic melanoma (n=3) and MIS (n=28) samples. FDR < 0.05. **(B)** Expression (log<sub>2</sub>) of selected  
655 genes in the MITF pathway in MIS (n=28; red bars to the left) and exophytic melanoma (n=3; green  
656 bars to the right) samples. Data is mean ± SEM. **(C)** Fluorescence microscopy of MIS (left) and  
657 exophytic melanoma (right) stained for DNA (blue), blood vessels (CD31: violet), and the melanoma  
658 progression marker MITF (red); the bottom panels are also stained for melanocytes (SOX10: green).  
659 Scale bar, 40 μm. **(D)** MITF protein detected by fluorescence microscopy in melanocytes (SOX10  
660 positive cells) in MIS, exophytic melanoma, or invasive tumor regions (\* P value < 0.05, t-test). **(E)**  
661 Fluorescence microscopy images of MIS (left), invasive tumor (center), or exophytic melanoma (right)  
662 stained for DNA (blue), AXL (gray), and, in the bottom panels, melanocytes (MART1: green). Scale  
663 bar, 100 μm.

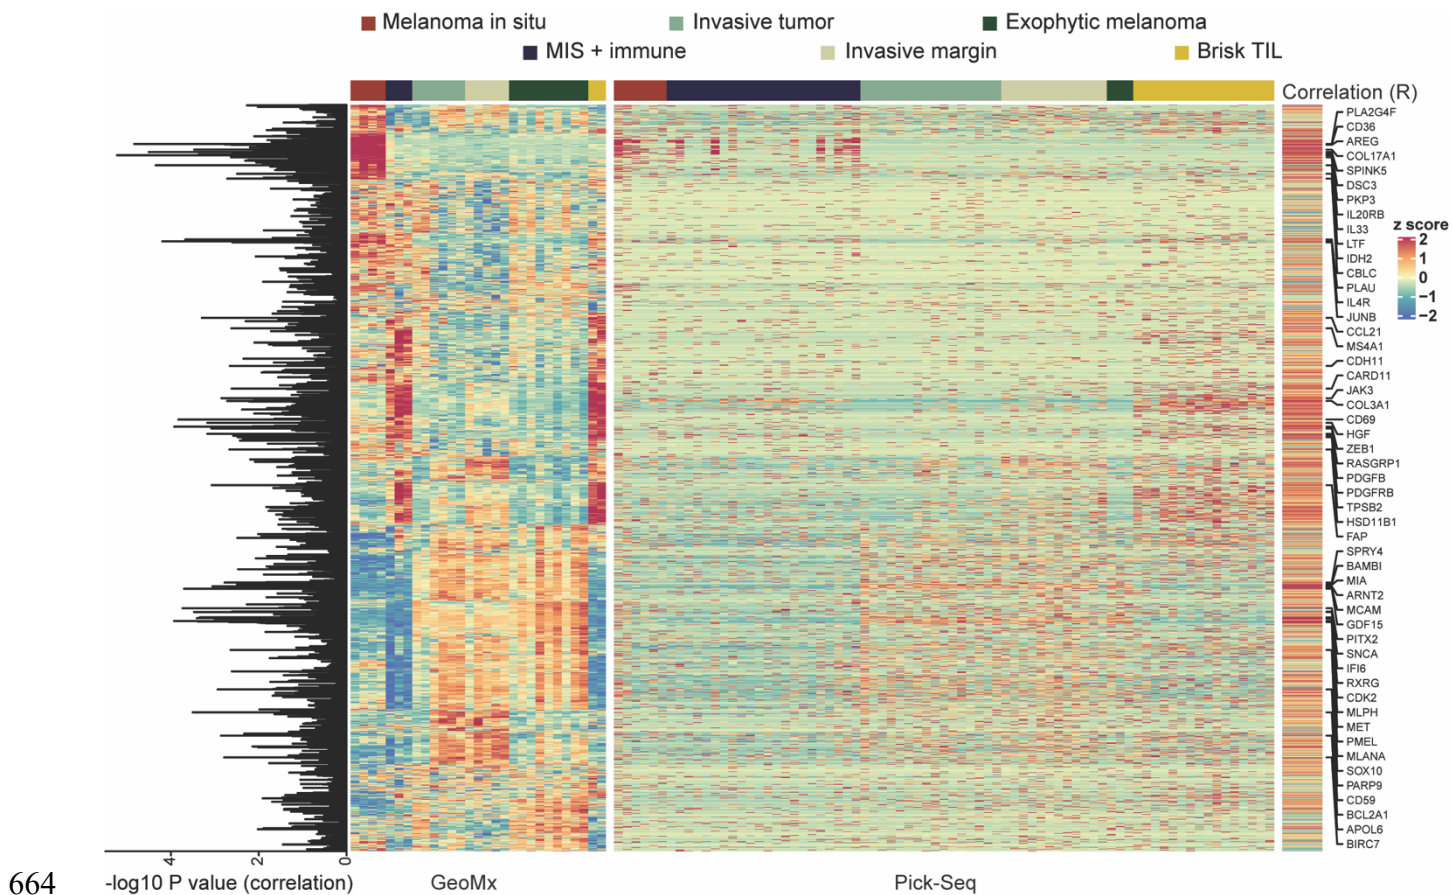

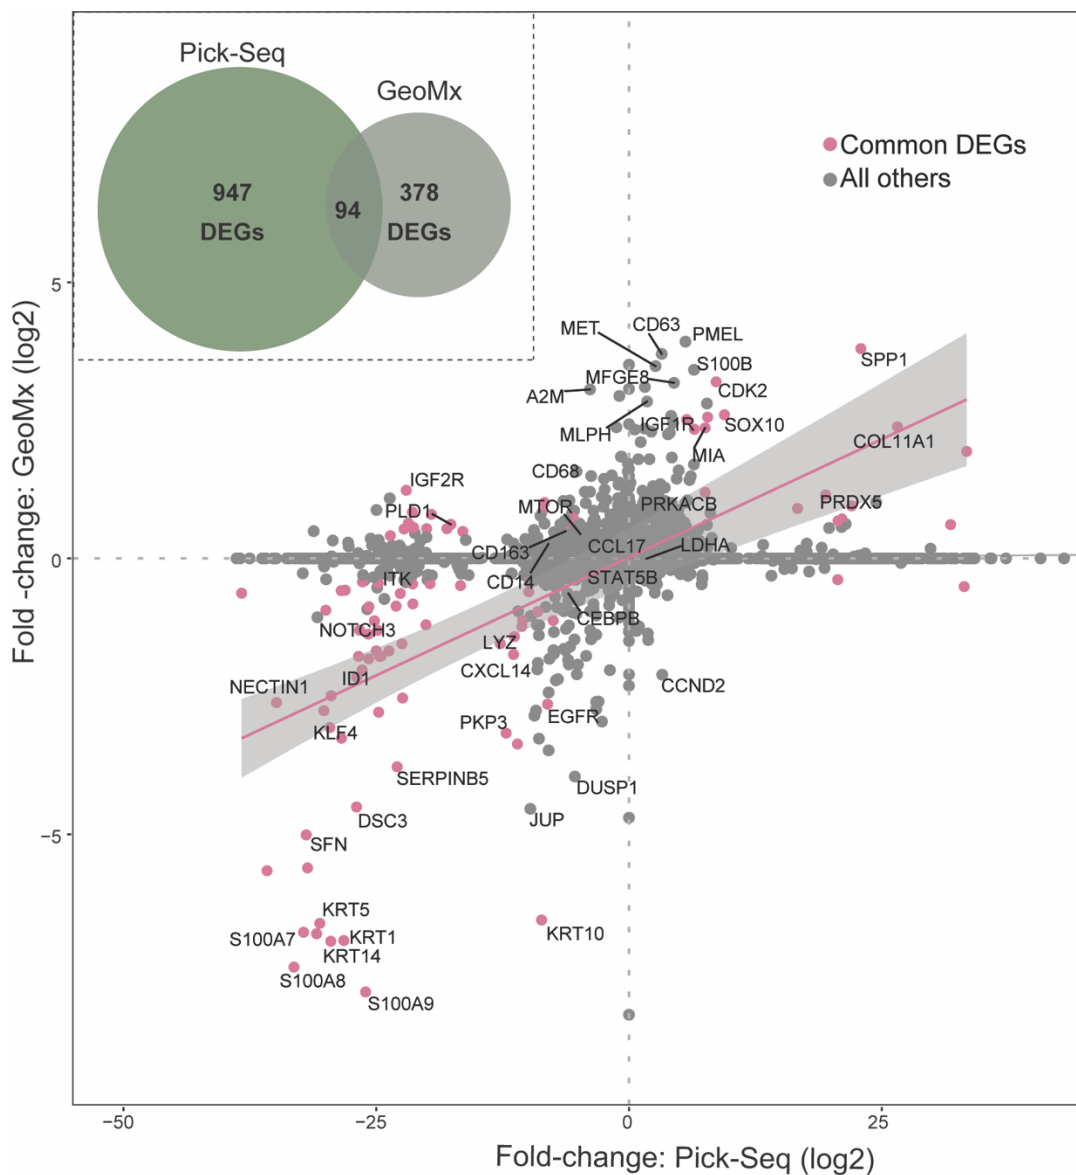

669

670 **Fig. 9: Comparison of Pick-Seq and GeoMx differentially expressed genes**

671 Differential expression (log2) for 94 DEGs (pink) measured using Pick-Seq and GeoMx. All other genes  
672 (gray). Trend-line (pink) and confidence interval (95%, gray) are indicated. For Pick-Seq, n=3 exophytic  
673 melanoma and n=28 MIS samples. For GeoMx, n=9 exophytic melanoma and n=7 MIS samples. Inset,  
674 top left, Venn diagram indicates the number of DEGs measured using one or both technologies.



675 **SUPPLEMENTARY MATERIALS**

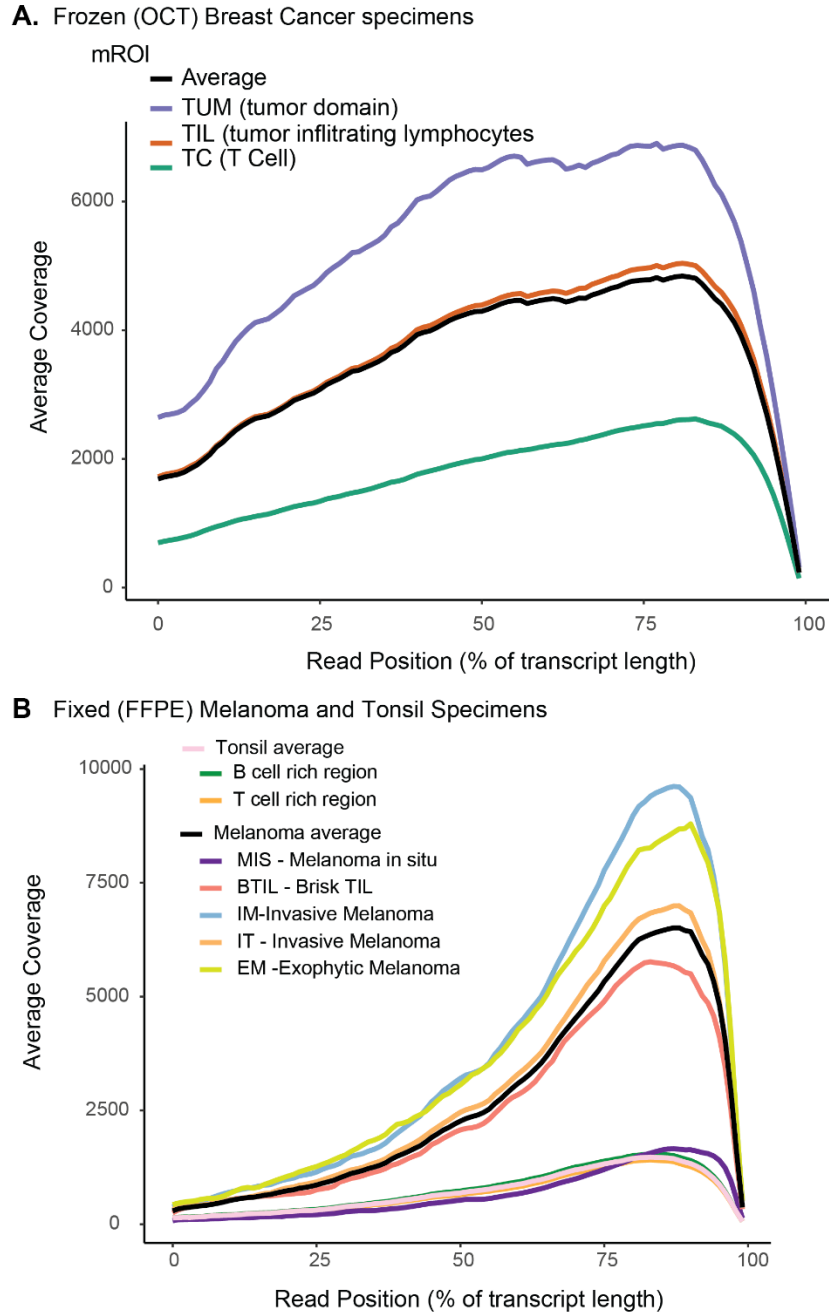

676

677 **Fig. S1: Positions of sequence reads**

678 Plots show mapped-read depth (y-axis) at each relative transcript position (x-axis). The read-depth is

679 averaged across mROI's belonging to the same sample group. The overall average for each tissue is also

680 shown. (A) Frozen (OCT) breast cancer mROIs. (B) FFPE tonsil and melanoma mROIs.

**A.** Fraction of reads successfully mapped for different specimens

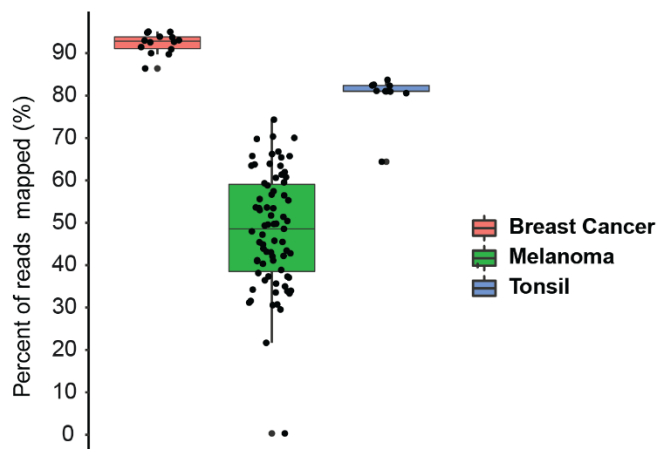

**B.** Genes Detected from mROIs in melanoma FFPE specimen

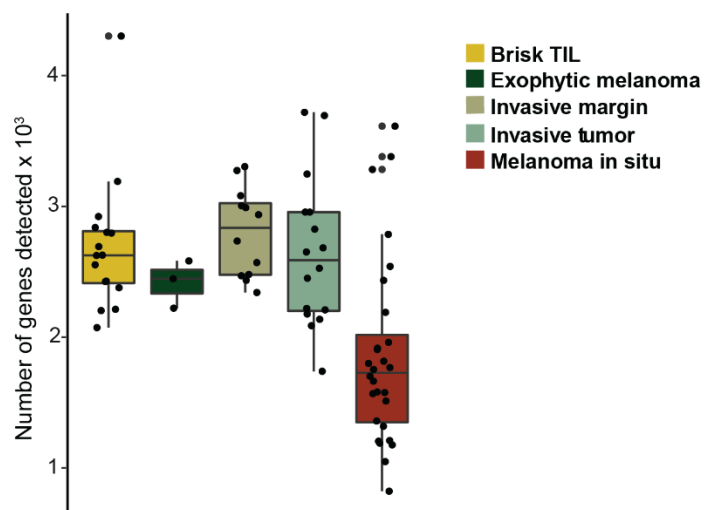

681

682 **Fig. S2: Reads mapped and genes detected for mROIs**

683 (A) Boxplot shows the median percentage of reads that could be mapped to the reference genome; the

684 lower and upper hinges correspond to the first and third quartiles. The points represent values for

685 individual mROI's. (B) Number of genes detected in each mROI sorted by histology feature; brisk TIL

686 (n=16), exophytic melanoma (n=3), invasive margin (n=12), invasive tumor (n=16), and MIS (n=28).

- 687 **Table S1: Normalized gene expression data for tonsil**
- 688 **Table S2: Normalized gene expression data for breast**
- 689 **Table S3: Normalized gene expression data for melanoma**
- 690 **Table S4: Normalized gene expression data for NanoString GeoMx**
- 691 **Table S5: Antibodies for FFPE tissue staining and imaging**
- 692 **Table S6: Regions of interest for transcriptional analysis**
